# Supplementary material for: Health and nutrition claims for infant formula: international cross sectional survey
Source: PubMed Central journal article supplement — BMJ. 2023 Feb 15;380:e071075. doi: 10.1136/bmj-2022-071075 (PMC9930154; doi:10.1136/bmj-2022-071075), 2023-02-15
Supplement: chek071075.ww.pdf [file chek071075.ww.pdf]

# International Survey of Infant Formula Health and Nutrition Claims

## Supplementary material

|                                                                                                                                                   |    |
|---------------------------------------------------------------------------------------------------------------------------------------------------|----|
| <b>Supplementary Figures</b> .....                                                                                                                | 2  |
| Supplementary Figure 1. Methodology Flowchart .....                                                                                               | 2  |
| Supplementary Figure 2. Heat map illustrating ingredients linked to health and nutrition claim for all countries .....                            | 3  |
| Supplementary Figure 3. Network plot of claims associated with ingredients in infant formula marketed in those countries surveyed in 2020 .....   | 4  |
| Supplementary Figure 4. Network plot of claims associated with ingredients in infant formula marketed in those countries surveyed in 2022 .....   | 5  |
| <b>Supplementary Tables</b> .....                                                                                                                 | 6  |
| Supplementary Table 1. Health and nutrition claim type for all countries surveyed .....                                                           | 6  |
| Supplementary Table 2. Most common claims made for infant formula marketed in those countries surveyed in 2020 .....                              | 8  |
| Supplementary Table 3. Most common claims made for infant formula marketed in those countries surveyed in 2022 .....                              | 10 |
| Supplementary Table 4. Most common ingredients cited in claims for infant formula marketed in those countries surveyed in 2020 .....              | 12 |
| Supplementary Table 5. Most common ingredients cited in claims for infant formula marketed in countries surveyed in 2022 .....                    | 13 |
| Supplementary Table 6. Scientific substantiation of 10 most common infant formula health and nutrition claims across all countries surveyed ..... | 14 |
| Supplementary Table 7. Risk of bias assessments of registered clinical trials .....                                                               | 15 |
| Supplementary Table 8. Risk of bias assessments of systematic reviews (ROBIS) .....                                                               | 34 |
| <b>References</b> .....                                                                                                                           | 37 |

## Supplementary Figures

Supplementary Figure 1. Methodology Flowchart

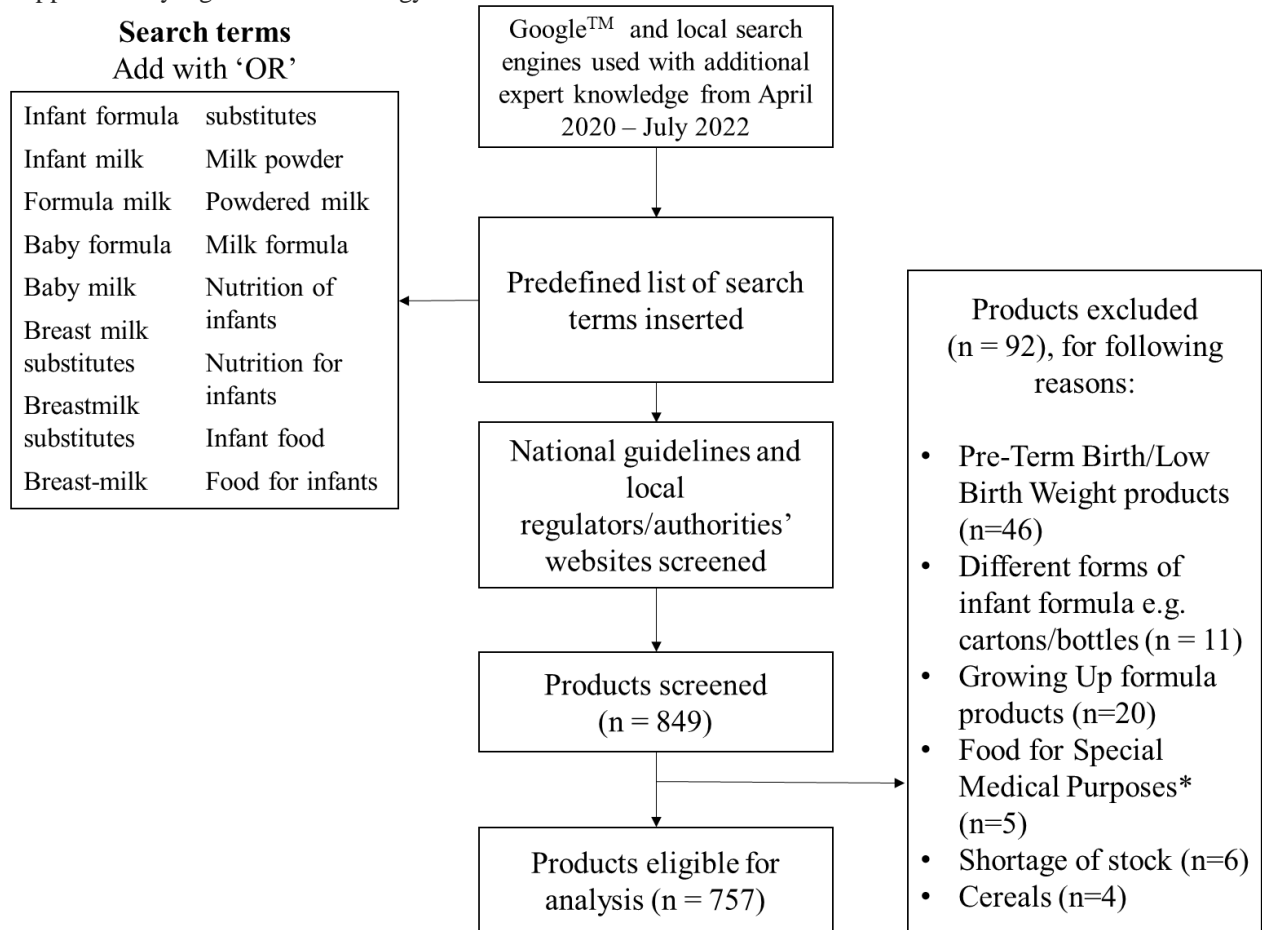

\*Food for Special Medical Purposes including formulas for inborn errors of metabolism, such as galactosemia; residual lactose formula; fructose-based formula; MCT-enhanced formula; low calcium formula.

Supplementary Figure 2. Heat map illustrating ingredients linked to health and nutrition claim for all countries

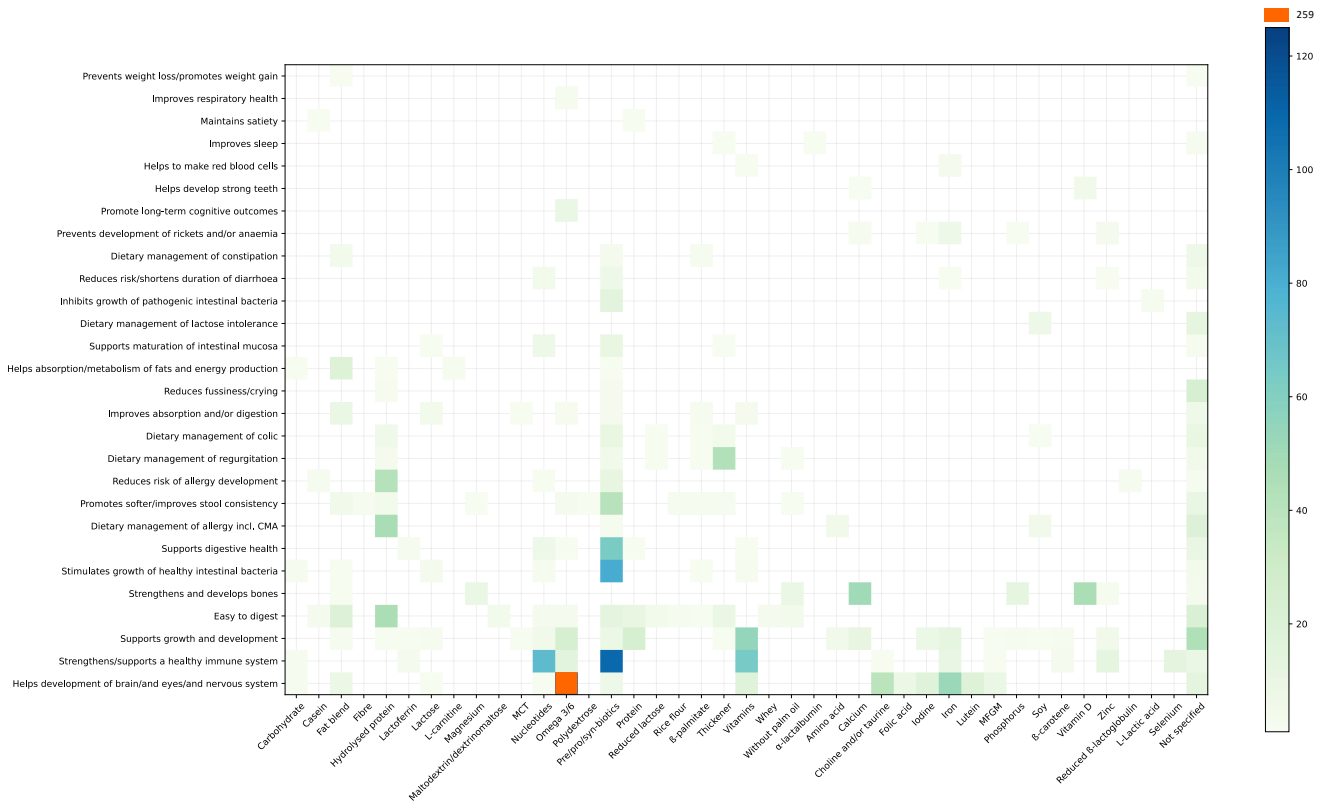

Supplementary Figure 3. Network plot of claims associated with ingredients in infant formula marketed in those countries surveyed in 2020

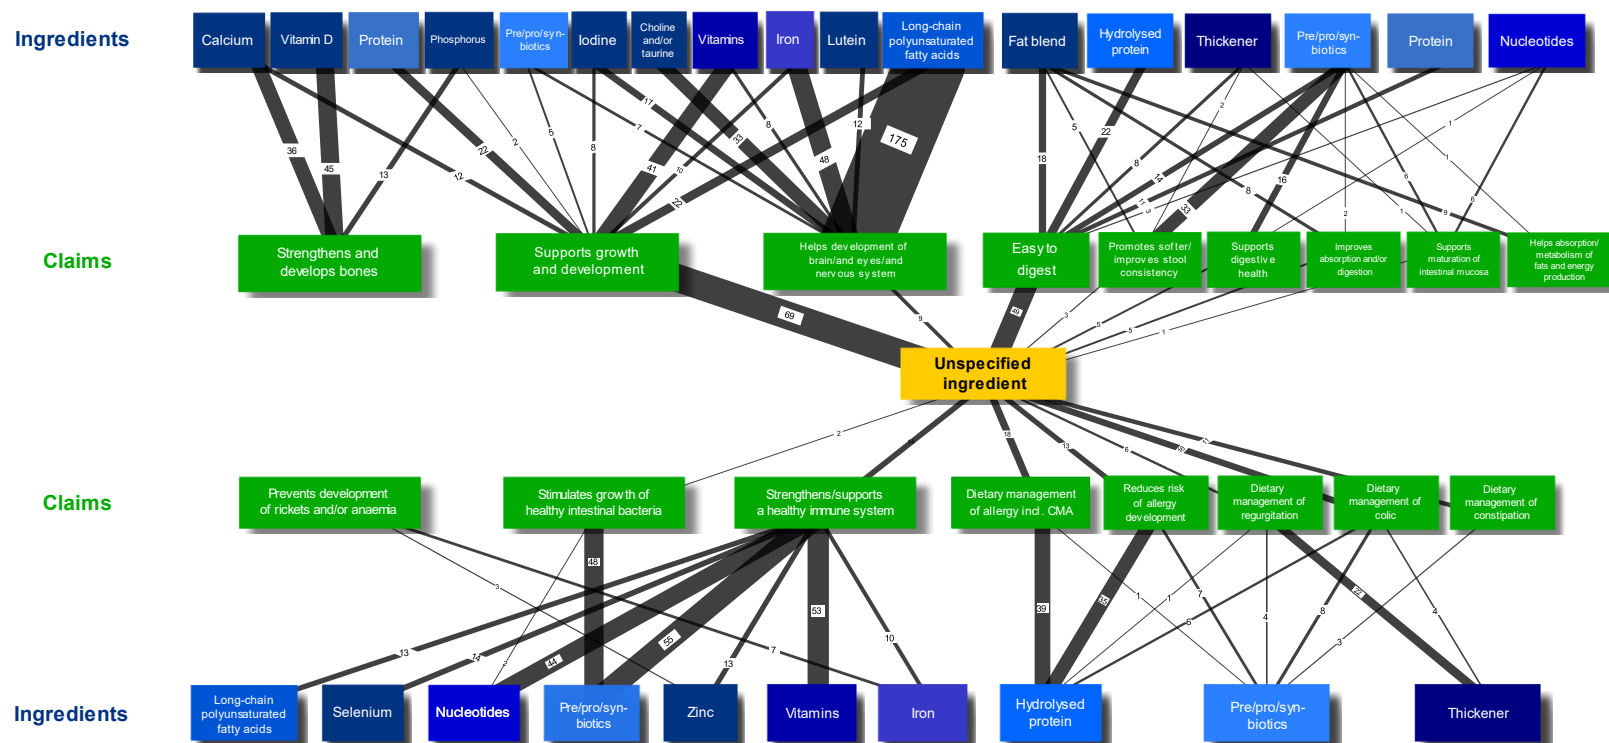

Network plot of claims associated with ingredients, with a frequency of ten or more, from Australia, Canada, Germany, India, Italy, Japan, Norway, Pakistan, Russia, Spain and the United Kingdom. The yellow midpoint represents health claims associated with a non-specified ingredient. Blue labels represent the type of ingredient; green labels represent health and nutrition claims. The thickness of the lines represents the frequency of health claims being associated with an ingredient.

Supplementary Figure 4. Network plot of claims associated with ingredients in infant formula marketed in those countries surveyed in 2022

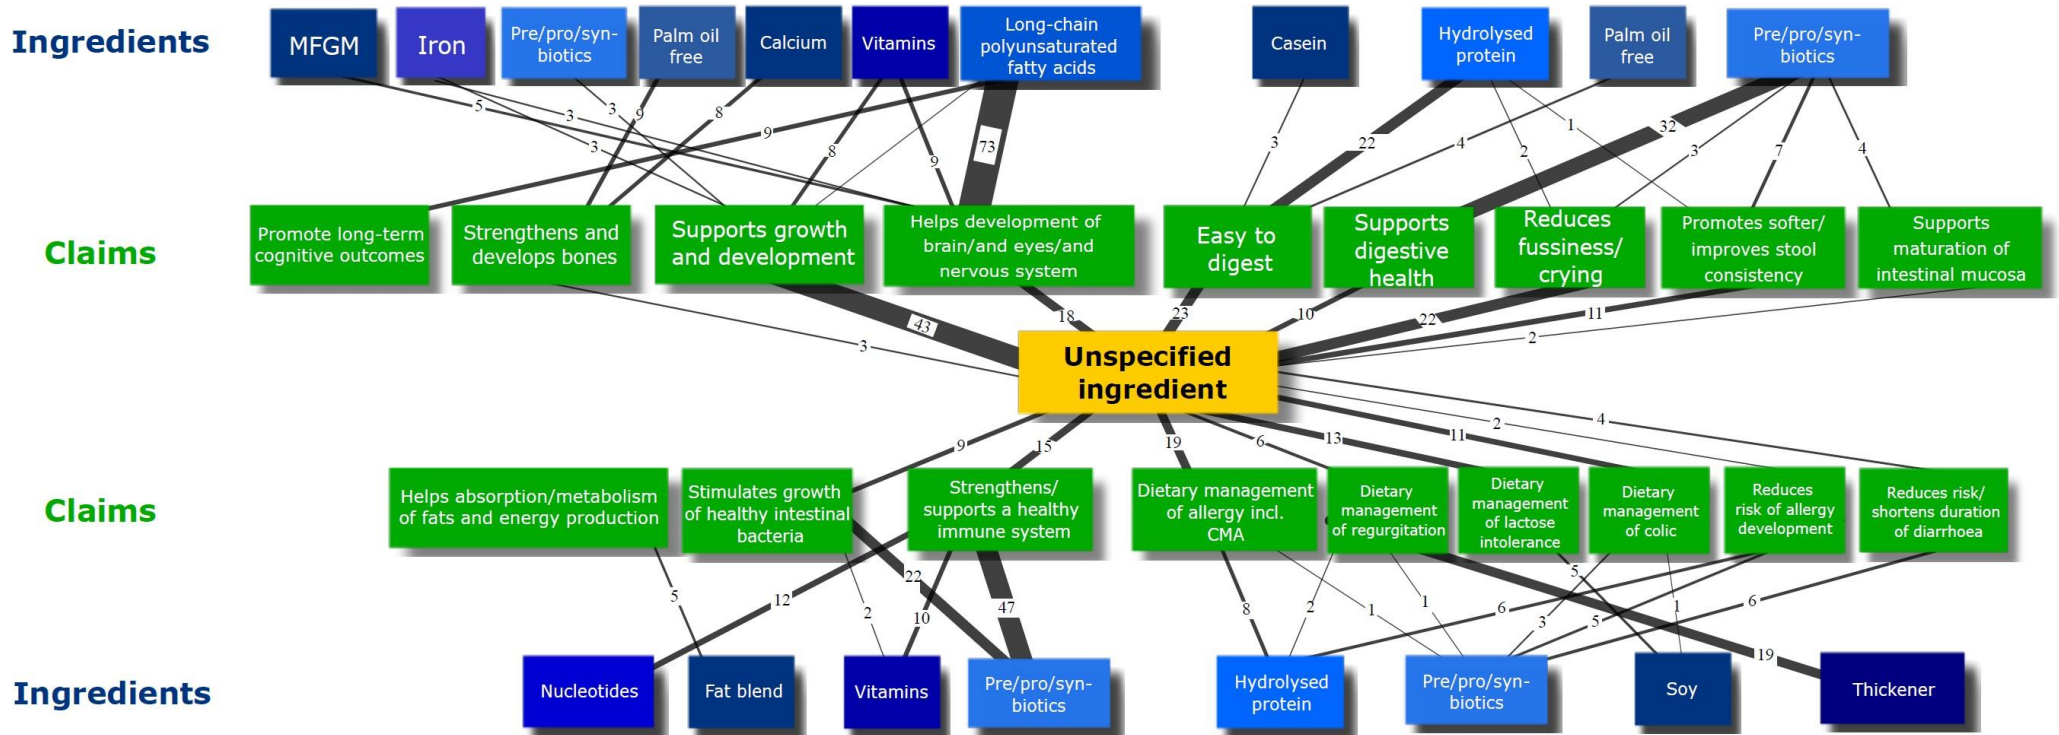

Network plot of claims associated with ingredients, with a frequency of three or more, from Saudi Arabia, Nigeria, South Africa and USA. The yellow midpoint represents health claims associated with a non-specified ingredient. Blue labels represent the type of ingredient; green labels represent health and nutrition claims. The thickness of the lines represents the frequency of health claims being associated with an ingredient.

## Supplementary Tables

Supplementary Table 1. Health and nutrition claim type for all countries surveyed

| Country      | Number of health and nutrition claims/Number of infant formula products (Ratio) | Products with $\geq 1$ health or nutrition claim (%) | Growth and development effect | Functional process or outcome effect | Effect on a disease, disorder or condition | Physiological process or outcome effect | WHO code compliance score (/100) | Ever breastfed percentage (UNICEF 2018 report) | Human Development Index (UNDP 2020) |
|--------------|---------------------------------------------------------------------------------|------------------------------------------------------|-------------------------------|--------------------------------------|--------------------------------------------|-----------------------------------------|----------------------------------|------------------------------------------------|-------------------------------------|
| USA          | 340/76 (4.5)                                                                    | 76 (100%)                                            | 123 (36%)                     | 115 (34%)                            | 24 (7%)                                    | 78 (23%)                                | No legal measures                | 74%                                            | 0.926                               |
| Russia       | 367/103 (3.6)                                                                   | 98 (95%)                                             | 148 (40%)                     | 68 (19%)                             | 65 (18%)                                   | 86 (23%)                                | 18                               | 92%                                            | 0.824                               |
| Saudi Arabia | 226/70 (3.2)                                                                    | 63 (90%)                                             | 65 (29%)                      | 55 (24%)                             | 54 (24%)                                   | 52 (23%)                                | 77                               | Not reported                                   | 0.854                               |
| Norway       | 102/32 (3.2)                                                                    | 23 (72%)                                             | 52 (51%)                      | 11 (11%)                             | 19 (19%)                                   | 20 (20%)                                | 39                               | 95%                                            | 0.957                               |
| UK           | 159/60 (2.7)                                                                    | 52 (87%)                                             | 69 (43%)                      | 29 (18%)                             | 28 (18%)                                   | 33 (21%)                                | 39                               | 81%                                            | 0.932                               |
| India        | 157/60 (2.6)                                                                    | 46 (77%)                                             | 75 (48%)                      | 24 (15%)                             | 16 (10%)                                   | 42 (27%)                                | 78                               | 96%                                            | 0.645                               |
| Pakistan     | 106/43 (2.5)                                                                    | 33 (77%)                                             | 55 (52%)                      | 12 (11%)                             | 13 (12%)                                   | 26 (25%)                                | 73                               | 94%                                            | 0.557                               |
| Canada       | 99/49 (2.0)                                                                     | 43 (88%)                                             | 47 (48%)                      | 27 (27%)                             | 13 (13%)                                   | 12 (12%)                                | No legal measures                | 89%                                            | 0.929                               |
| South Africa | 87/51 (1.7)                                                                     | 42 (82%)                                             | 5 (6%)                        | 20 (23%)                             | 45 (52%)                                   | 17 (19%)                                | 87                               | Not reported                                   | 0.709                               |
| Japan        | 33/21 (1.6)                                                                     | 17 (81%)                                             | 16 (49%)                      | 8 (24%)                              | 7 (21%)                                    | 2 (6%)                                  | No legal measures                | Not reported                                   | 0.919                               |
| Nigeria      | 31/19 (1.6)                                                                     | 14 (74%)                                             | 19 (61%)                      | 7 (23%)                              | 3 (10%)                                    | 2 (6%)                                  | 84                               | 95%                                            | 0.539                               |
| Germany      | 56/43 (1.3)                                                                     | 30 (70%)                                             | 31 (55%)                      | 4 (7%)                               | 13 (23%)                                   | 8 (14%)                                 | 39                               | 82%                                            | 0.947                               |
| Spain        | 29/19 (1.5)                                                                     | 12 (63%)                                             | 13 (45%)                      | 3 (10%)                              | 5 (17%)                                    | 8 (28%)                                 | 39                               | 77%                                            | 0.904                               |

| Country      | Number of health and nutrition claims/Number of infant formula products (Ratio) | Products with $\geq 1$ health or nutrition claim (%) | Growth and development effect | Functional process or outcome effect | Effect on a disease, disorder or condition | Physiological process or outcome effect | WHO code compliance score (/100) | Ever breastfed percentage (UNICEF 2018 report) | Human Development Index (UNDP 2020) |
|--------------|---------------------------------------------------------------------------------|------------------------------------------------------|-------------------------------|--------------------------------------|--------------------------------------------|-----------------------------------------|----------------------------------|------------------------------------------------|-------------------------------------|
| Italy        | 69/82 (0.8)                                                                     | 43 (52%)                                             | 8 (12%)                       | 11 (16%)                             | 44 (64%)                                   | 6 (9%)                                  | 39                               | 86%                                            | 0.892                               |
| Australia    | 23/29 (0.8)                                                                     | 16 (55%)                                             | 5 (22%)                       | 2 (9%)                               | 15 (65%)                                   | 1 (4%)                                  | No legal measures                | 92%                                            | 0.944                               |
| <b>Total</b> | <b>1884/757 (Median = 2)</b>                                                    | <b>608/757 (80%, Median = 23)</b>                    | <b>728/1884 (39%)</b>         | <b>393/1884(21%)</b>                 | <b>364/1884 (19%)</b>                      | <b>393/1884 (21%)</b>                   |                                  |                                                |                                     |

Data shown are claim rates for each country surveyed, claim type, World Health Organization (WHO) breast feeding code compliance score (Marketing of Breast-milk substitutes: Status report 2020)(1), Ever breastfed percentage (UNICEF 2018 report)(2), Human Development Index (UNDP 2020)(3). Claims were classified here into four different categories, based on the approach of Berry 2017 (4): (i) Growth and development effect (ii) Functional process or outcome effect (iii) Effect on a disease, disorder or condition (iv) Physiological process or outcome effect.

Supplementary Table 2. Most common claims made for infant formula marketed in those countries surveyed in 2020

| <b>Claim</b>                                                          | <b>Number (%) of products with relevant claim (Total of 413 products with ≥1 claim)</b> | <b>Number of claims with an ingredient cited</b> | <b>Example claim</b>                                                                                                                                      | <b>Number (%) of 0-6/0-12 months formula (infant) products with ≥1 claim (Total 137 infant products)</b> | <b>Number (%) of 6–12 month formula (Follow-On) products with ≥1 claim (Total of 78 Follow-On products)</b> | <b>Number (%) of FSMP products with ≥1 claim (Total of 198 FSMP products)</b> |
|-----------------------------------------------------------------------|-----------------------------------------------------------------------------------------|--------------------------------------------------|-----------------------------------------------------------------------------------------------------------------------------------------------------------|----------------------------------------------------------------------------------------------------------|-------------------------------------------------------------------------------------------------------------|-------------------------------------------------------------------------------|
| Helps/supports development of brain and/or eyes and/or nervous system | 210 (51%)                                                                               | 47                                               | <i>"Contains a clinically proven level of DHA, an important building block of your baby's developing brain."</i>                                          | 74 (54%)                                                                                                 | 54 (69%)                                                                                                    | 75 (38%)                                                                      |
| Helps/supports growth and development                                 | 161 (40%)                                                                               | 61                                               | <i>"Arachidonic acid: Components contained in breast milk helps growth and development."</i>                                                              | 58 (42%)                                                                                                 | 35 (45%)                                                                                                    | 49 (25%)                                                                      |
| Strengthens/supports a healthy immune system                          | 148 (36%)                                                                               | 44                                               | <i>"Studies have shown positive effects of nucleotides for the infants' immune function and in periods with rapid growth like in the newborn period."</i> | 63 (46%)                                                                                                 | 46 (60%)                                                                                                    | 39 (20%)                                                                      |
| Easy to digest                                                        | 123 (30%)                                                                               | 42                                               | <i>"Amino acids means that this will be easily digestible, and is good for infants with stomach - and digestive - conditions."</i>                        | 46 (34%)                                                                                                 | 14 (18%)                                                                                                    | 61 (31%)                                                                      |
| Dietary management of allergy incl. cow's milk allergy (CMA)          | 68 (16%)                                                                                | 25                                               | <i>"It helps babies in consuming milk and get the protein without an allergic response."</i>                                                              | 0 (0%)                                                                                                   | 0 (0%)                                                                                                      | 51 (26%)                                                                      |
| Stimulates growth of healthy intestinal bacteria                      | 56 (14%)                                                                                | 13                                               | <i>"Whey proteins, lactose and nucleotides to support the growth of useful gut bacteria."</i>                                                             | 22 (16%)                                                                                                 | 12 (15%)                                                                                                    | 22 (11%)                                                                      |
| Strengthens and develops bones                                        | 52 (13%)                                                                                | 21                                               | <i>"Supports the normal development of bones and</i>                                                                                                      | 17 (12%)                                                                                                 | 28 (36%)                                                                                                    | 7 (4%)                                                                        |



|                                            |          |    |                                                                                                                                                                                                |          |         |          |
|--------------------------------------------|----------|----|------------------------------------------------------------------------------------------------------------------------------------------------------------------------------------------------|----------|---------|----------|
|                                            |          |    | <i>teeth with vitamin D (according to the law)."</i>                                                                                                                                           |          |         |          |
| Promotes softer/improves stool consistency | 50 (12%) | 22 | <i>"Contains a blend of 2 dietary fibres, GOS and polydextrose, shown to soften stools."</i>                                                                                                   | 20 (15%) | 8 (10%) | 22 (11%) |
| Reduces risk of allergy development        | 49 (12%) | 18 | <i>"It is clinically demonstrated to help reduce future allergy challenges at 3 years."</i>                                                                                                    | 13 (9%)  | 3 (4%)  | 26 (13%) |
| Dietary management of colic                | 40 (10%) | 17 | <i>"It is formulated to aid digestive malabsorption with an enriched level of sn-2 palmitate to help ease constipation (soften stools) and a reduced level of lactose to help ease colic."</i> | 5 (4%)   | 3 (4%)  | 25 (13%) |
| Dietary management of regurgitation        | 32 (8%)  | 17 | <i>"Contains rice starch that becomes thicker in your baby's stomach is clinically proven to reduce frequent spit up."</i>                                                                     | 0 (0%)   | 0 (0%)  | 20 (10%) |
| Improves absorption and/or digestion       | 24 (6%)  | 14 | <i>"Improved absorption and digestion due to the presence of: An easy to digest fat blend including MCT/LCT"</i>                                                                               | 7 (5%)   | 5 (6%)  | 12 (6%)  |
| Dietary management of constipation         | 10 (2%)  | 6  | <i>"NAN Sensilac is an infant formula based on cow's milk, especially developed for children with sensitive stomachs and those with a tendency to constipation."</i>                           | 4 (3%)   | 1 (1%)  | 4 (2%)   |

Number of products with relevant claim  $\geq 10$  made for different categories of infant formula: from birth (0-6/0-12 months); follow on (6-12 months); food for special medical purposes (FSMP), from Australia, Canada, Germany, India, Italy, Japan, Norway, Pakistan, Russia, Spain and the United Kingdom, 2020

Supplementary Table 3. Most common claims made for infant formula marketed in those countries surveyed in 2022

| Claim                                                                 | Number (%) of products with relevant claim (Total 195 with ≥1 claim) | Number of claims with an ingredient cited | Example claim                                                                                                                                                                              | Number (%) of 0-6/0-12 months formula (infant) products with ≥1 claim (Total of 85 infant products) | Number (%) of 6-12-month formula (Follow-On) products with ≥1 claim (Total of 17 Follow-On products) | Number (%) of FSMP products with ≥1 claim (Total of 93 FSMP products) |
|-----------------------------------------------------------------------|----------------------------------------------------------------------|-------------------------------------------|--------------------------------------------------------------------------------------------------------------------------------------------------------------------------------------------|-----------------------------------------------------------------------------------------------------|------------------------------------------------------------------------------------------------------|-----------------------------------------------------------------------|
| Helps/supports development of brain and/or eyes and/or nervous system | 113 (58%)                                                            | 125                                       | <i>"Omega-3 DHA like that found in Enfamil has been clinically shown to: improve attention span, problem solving, and visual development."</i>                                             | 63 (74%)                                                                                            | 8 (47%)                                                                                              | 41 (44%)                                                              |
| Strengthens/supports a healthy immune system                          | 91 (47%)                                                             | 99                                        | <i>"2'FL-HMO is a prebiotic similar to that found in breast milk, shown to help support digestive and immune health."</i>                                                                  | 25 (29%)                                                                                            | 7 (41%)                                                                                              | 31 (33%)                                                              |
| Helps/supports growth and development                                 | 63 (32%)                                                             | 27                                        | <i>"Clinically shown to support the growth of exclusively formula-fed infants."</i>                                                                                                        | 24 (28%)                                                                                            | 5 (30%)                                                                                              | 26 (28%)                                                              |
| Easy to digest                                                        | 59 (30%)                                                             | 40                                        | <i>"Easy-to-digest 60:40 whey-to-casein ratio prior to partial hydrolyzation, patterned after mature breast milk."</i>                                                                     | 29 (34%)                                                                                            | 2 (12%)                                                                                              | 28 (34%)                                                              |
| Stimulates growth of healthy intestinal bacteria                      | 35 (18%)                                                             | 37                                        | <i>"The prebiotic blend in Enfamil Reguline has been clinically proven through multiple published studies to promote beneficial bacteria in the digestive tract and to soften stools."</i> | 18 (21%)                                                                                            | 3 (18%)                                                                                              | 14 (15%)                                                              |
| Dietary management of allergy incl. cow's milk allergy (CMA)          | 28 (14%)                                                             | 10                                        | <i>"Helps more babies overcome cow's milk allergy and return to consuming regular milk proteins in as fast as 6 months of feeding."</i>                                                    | 1 (1%)                                                                                              | 0 (0%)                                                                                               | 20 (22%)                                                              |

| Claim                                      | Number (%) of products with relevant claim (Total 195 with ≥1 claim) | Number of claims with an ingredient cited | Example claim                                                                                                                                         | Number (%) of 0-6/0-12 months formula (infant) products with ≥1 claim (Total of 85 infant products) | Number (%) of 6–12-month formula (Follow-On) products with ≥1 claim (Total of 17 Follow-On products) | Number (%) of FSMP products with ≥1 claim (Total of 93 FSMP products) |
|--------------------------------------------|----------------------------------------------------------------------|-------------------------------------------|-------------------------------------------------------------------------------------------------------------------------------------------------------|-----------------------------------------------------------------------------------------------------|------------------------------------------------------------------------------------------------------|-----------------------------------------------------------------------|
| Dietary management of regurgitation        | 22 (11%)                                                             | 24                                        | <i>"A thickened milk-based infant formula design to reduce frequent spit-up that also has brain- building DHA as recommended by experts."</i>         | 0 (0%)                                                                                              | 0 (0%)                                                                                               | 18 (19%)                                                              |
| Strengthens and develops bones             | 25 (13%)                                                             | 24                                        | <i>"Promotes Strong Bones: Has no palm oil to promote excellent calcium absorption for strong bones."</i>                                             | 16 (19%)                                                                                            | 2 (12%)                                                                                              | 7 (8%)                                                                |
| Promotes softer/improves stool consistency | 21 (11%)                                                             | 14                                        | <i>"Promotes soft stools similar to those reported for breastfed infants."</i>                                                                        | 13 (15%)                                                                                            | 2 (12%)                                                                                              | 6 (6%)                                                                |
| Dietary management of colic                | 15 (8%)                                                              | 4                                         | <i>"Fast relief from severe crying/colic."</i>                                                                                                        | 1 (1%)                                                                                              | 0 (0%)                                                                                               | 12 (13%)                                                              |
| Reduces risk of allergy development        | 14 (7%)                                                              | 12                                        | <i>"It is clinically demonstrated to help reduce future allergy challenges at 3 years."</i>                                                           | 4 (5%)                                                                                              | 2 (12%)                                                                                              | 8 (9%)                                                                |
| Dietary management of constipation         | 10 (5%)                                                              | 2                                         | <i>"Helps significantly relieve the symptoms of mild constipation, such as slow passage of the stools, acting along the baby's digestive system."</i> | 1 (1%)                                                                                              | 0 (0%)                                                                                               | 7 (8%)                                                                |
| Improves absorption and/or digestion       | 11 (6%)                                                              | 6                                         | <i>"The Gerber formula also has a fat blend with MCT oil to help facilitate fat absorption."</i>                                                      | 4 (5%)                                                                                              | 0 (0%)                                                                                               | 7 (8%)                                                                |

Number of products with relevant claim ≥ 10 made for different categories of infant formula: from birth (0-6/0-12 months); follow on (6-12 months); food for special medical purposes (FSMP), from Nigeria, South Africa, Saudi Arabia and USA

Supplementary Table 4. Most common ingredients cited in claims for infant formula marketed in those countries surveyed in 2020

| <b>Ingredient</b>                      | <b>Number (%) of products with relevant ingredient/Total of 413 products with ≥1 claim (%)</b> | <b>Number of separate claims cited for relevant ingredient</b> | <b>Example claim</b>                                                                                                                                                                          | <b>Number (%) of 0-6/0-12 months formula (infant) products with ≥1 claim related to relevant ingredient (Total of 137 infant products)</b> | <b>Number (%) of 6-12 month formula (Follow-On) products with ≥1 claim related to relevant ingredient (Total of 78 Follow-On products)</b> | <b>Number of FSMP products with ≥1 claim related to relevant ingredient (Total of 198 FSMP products)</b> |
|----------------------------------------|------------------------------------------------------------------------------------------------|----------------------------------------------------------------|-----------------------------------------------------------------------------------------------------------------------------------------------------------------------------------------------|--------------------------------------------------------------------------------------------------------------------------------------------|--------------------------------------------------------------------------------------------------------------------------------------------|----------------------------------------------------------------------------------------------------------|
| Not specified                          | 185 (45%)                                                                                      | 266                                                            | -                                                                                                                                                                                             | 65 (47%)                                                                                                                                   | 20 (26%)                                                                                                                                   | 98 (49%)                                                                                                 |
| Pre/pro/syn-biotics                    | 129 (31%)                                                                                      | 216                                                            | <i>“This specific blend prebiotics has been shown to encourage the growth and activity of beneficial bacteria in the infant gut, as well as improve stool frequency and consistency.”</i>     | 56 (41%)                                                                                                                                   | 25 (32%)                                                                                                                                   | 47 (24%)                                                                                                 |
| Long-chain polyunsaturated fatty acids | 186 (45%)                                                                                      | 213                                                            | <i>“With the addition of long chain omega 3 and omega 6 fatty acids, the proteins have been replaced with amino acids, assisting with the healthy brain and eye development of children.”</i> | 67 (49%)                                                                                                                                   | 48 (62%)                                                                                                                                   | 71 (36%)                                                                                                 |
| Vitamins                               | 86 (21%)                                                                                       | 156                                                            | <i>“Vitamins A, C &amp; D to help support the normal function of baby’s immune system...”</i>                                                                                                 | 29 (21%)                                                                                                                                   | 34 (44%)                                                                                                                                   | 24 (12%)                                                                                                 |
| Hydrolysed protein                     | 83 (20%)                                                                                       | 108                                                            | <i>“...contains a unique combination of starch and 100% whey, partially hydrolysed protein for the dietary management of reflux and regurgitation.”</i>                                       | 9 (7%)                                                                                                                                     | 2 (3%)                                                                                                                                     | 72 (36%)                                                                                                 |

Number of separate claims cited for ≥ 20 ingredients in different categories of infant formula: from birth (0-6/0-12 months); follow on (6-12 months); food for special medical purposes (FSMP), from Australia, Canada, Germany, India, Italy, Japan, Norway, Pakistan, Russia, Spain and the United Kingdom, 2020

Supplementary Table 5. Most common ingredients cited in claims for infant formula marketed in countries surveyed in 2022

| Ingredient                             | Number (%) of products with relevant ingredient/ (Total of 195 products with $\geq 1$ claim) | Number of separate claims cited for relevant ingredient | Example claim                                                                                                                                                                     | Number (%) of 0-6/0-12 months formula (infant) products with $\geq 1$ claim related to relevant ingredient (Total of 85 infant products) | Number (%) of 6-12 month formula (Follow-On) products with $\geq 1$ claim related to relevant ingredient (Total of 17 Follow-On products) | Number (%) of FSMP products with $\geq 1$ claim related to relevant ingredient (Total of 93 FSMP products) |
|----------------------------------------|----------------------------------------------------------------------------------------------|---------------------------------------------------------|-----------------------------------------------------------------------------------------------------------------------------------------------------------------------------------|------------------------------------------------------------------------------------------------------------------------------------------|-------------------------------------------------------------------------------------------------------------------------------------------|------------------------------------------------------------------------------------------------------------|
| Not specified                          | 122 (63%)                                                                                    | 207                                                     | -                                                                                                                                                                                 | 15 (18%)                                                                                                                                 | 2 (12%)                                                                                                                                   | 30 (32%)                                                                                                   |
| Pre/pro/syn-biotics                    | 96 (49%)                                                                                     | 173                                                     | <i>“Prebiotics and vitamins to help support digestive and immune health.”</i>                                                                                                     | 28 (33%)                                                                                                                                 | 3 (17%)                                                                                                                                   | 15 (16%)                                                                                                   |
| Long-chain polyunsaturated fatty acids | 92 (47%)                                                                                     | 109                                                     | <i>“DHA has been demonstrated in clinical studies to: Support cognitive and visual development. Promote long-term cognitive outcomes through 5 years of age.”</i>                 | 9 (11%)                                                                                                                                  | 1 (6%)                                                                                                                                    | 7 (8%)                                                                                                     |
| Hydrolysed protein                     | 37 (19%)                                                                                     | 44                                                      | <i>“Partially hydrolyzed protein for easy digestion.”</i>                                                                                                                         | 3 (4%)                                                                                                                                   | 0 (0%)                                                                                                                                    | 3 (3%)                                                                                                     |
| Vitamins                               | 30 (15%)                                                                                     | 37                                                      | <i>“Features our exclusive blend of DHA, lutein, and vitamin E, ingredients found in breast milk that are important for helping to support baby’s brain and eye development.”</i> | 4 (5%)                                                                                                                                   | 2 (12%)                                                                                                                                   | 2 (2%)                                                                                                     |

Number of separate claims cited for  $\geq 20$  ingredients in different categories of infant formula: from birth (0-6/0-12 months); follow on (6-12 months); food for special medical purposes (FSMP), from Nigeria, South Africa, Saudi Arabia and USA

Supplementary Table 6. Scientific substantiation of 10 most common infant formula health and nutrition claims across all countries surveyed

| Type of claim                                                         | Total number of claims citing references | Number (%) of claims citing registered clinical trials | Number (%) of claims citing unregistered clinical trials | Number (%) of claims citing review articles | Number (%) of claims citing meta/pooled analyses/systematic reviews | Number (%) of claims citing other peer-reviewed citation* | Number (%) of claims citing reports/guidelines/regulations | Number (%) of claims with non-peer reviewed citation cited |
|-----------------------------------------------------------------------|------------------------------------------|--------------------------------------------------------|----------------------------------------------------------|---------------------------------------------|---------------------------------------------------------------------|-----------------------------------------------------------|------------------------------------------------------------|------------------------------------------------------------|
| All claims                                                            | 560                                      | 107 (32 trials)                                        | 209 (96 trials)                                          | 103 (52 articles)                           | 28 (8 articles)                                                     | 56 (38 articles)                                          | 19 (10 articles)                                           | 38 (24 articles)                                           |
| Helps/supports development of brain and/or eyes and/or nervous system | 136                                      | 13 (12%)                                               | 63 (30%)                                                 | 19 (18%)                                    | 16 (57%)                                                            | 8 (14%)                                                   | 11 (58%)                                                   | 6 (16%)                                                    |
| Strengthens/supports a healthy immune system                          | 94                                       | 21 (20%)                                               | 19 (9%)                                                  | 32 (31%)                                    | 1 (4%)                                                              | 12 (20%)                                                  | 1 (5%)                                                     | 8 (21%)                                                    |
| Stimulates growth of healthy intestinal bacteria                      | 56                                       | 14 (13%)                                               | 13 (6%)                                                  | 21 (20%)                                    | 0 (0%)                                                              | 5 (9%)                                                    | 0 (0%)                                                     | 3 (8%)                                                     |
| Dietary management of allergy incl. cow's milk allergy (CMA)          | 49                                       | 8 (7%)                                                 | 25 (12%)                                                 | 6 (6%)                                      | 0 (0%)                                                              | 4 (7%)                                                    | 3 (16%)                                                    | 3 (8%)                                                     |
| Helps/supports growth and development                                 | 36                                       | 10 (9%)                                                | 13 (6%)                                                  | 2 (2%)                                      | 3 (11%)                                                             | 5 (9%)                                                    | 1 (5%)                                                     | 2 (5%)                                                     |
| Reduces risk of allergy development                                   | 36                                       | 7 (7%)                                                 | 8 (4%)                                                   | 12 (12%)                                    | 2 (7%)                                                              | 4 (7%)                                                    | 0 (0%)                                                     | 3 (8%)                                                     |
| Easy to digest                                                        | 27                                       | 4 (4%)                                                 | 8 (4%)                                                   | 2 (2%)                                      | 5 (18%)                                                             | 5 (9%)                                                    | 0 (0%)                                                     | 3 (8%)                                                     |
| Promotes softer/improves stool consistency                            | 24                                       | 5 (5%)                                                 | 11 (5%)                                                  | 3 (3%)                                      | 0 (0%)                                                              | 3 (5%)                                                    | 0 (0%)                                                     | 2 (5%)                                                     |
| Dietary management of colic                                           | 15                                       | 1 (1%)                                                 | 11 (5%)                                                  | 0 (0%)                                      | 0 (0%)                                                              | 1 (2%)                                                    | 0 (0%)                                                     | 2 (5%)                                                     |
| Strengthens and develops bones                                        | 7                                        | 0 (0%)                                                 | 2 (1%)                                                   | 2 (2%)                                      | 0 (0%)                                                              | 0 (0%)                                                    | 0 (0%)                                                     | 3 (8%)                                                     |

\*Including cohort studies; experimental studies; animal studies; cross-sectional studies; textbook chapters.

Supplementary Table 7. Risk of bias assessments of registered clinical trials

| Trial registration | Product in claim          | Claims cited to trial reference                                                                                                                                                                 | Claim related to randomised comparison?                                                               | Relevance of trial population                                                      | Relevance of trial intervention                                                                                                                   | Relevance of trial comparator                             | Relevance of trial outcome                                                                                                                        | ROB | Key ROB issues | Trial conflict of interest                                                         |
|--------------------|---------------------------|-------------------------------------------------------------------------------------------------------------------------------------------------------------------------------------------------|-------------------------------------------------------------------------------------------------------|------------------------------------------------------------------------------------|---------------------------------------------------------------------------------------------------------------------------------------------------|-----------------------------------------------------------|---------------------------------------------------------------------------------------------------------------------------------------------------|-----|----------------|------------------------------------------------------------------------------------|
| NCT00298337(5)     | Similac Gold (Russia)     | Decrease in eczema (as result of oligosaccharides of breastmilk)                                                                                                                                | No. Non randomised comparison from the placebo group of an RCT                                        | Same population - but trial outcome is only regarding infants born by C-section    | Both claim and trial relate to oligosaccharides. But claim is regarding Similac Gold and trial outcome was not related to same product            | Consistent with claim                                     | Decrease in eczema in high risk infants born by C-section at 2 years, but not at 5 years, using logistical regression models                      | -   | Not relevant   | Funded by Nestlé<br>Author(s) affiliated to Nestlé                                 |
| NCT00338689(6)     | SMA Pro First Infant (UK) | Contains closer amino acid profile to that of breastmilk which is thought to help support appropriate growth                                                                                    | No. Breastmilk group not randomised                                                                   | Same                                                                               | Both claim and study relate to low protein formula. However in trial, both infant and follow on formula is used, with differing protein contents. | Claim implies breastmilk. Trial used high protein formula | Branched chain amino acids in plasma of infants and their breakdown products. Nothing about growth or comparing AA profile of formula milk to BM. | -   | Not relevant   | Independent funding and authorship with no relevant conflict of interests declared |
| NCT01148667(7)     | Nutramigen with LGG (UK)  | Faster resolution of CMA symptoms vs Nutramigen without LGG                                                                                                                                     | Yes                                                                                                   | Claim implies all infants with CMA, trial looked at infants with atopic dermatitis | Same - LGG                                                                                                                                        | Consistent with claim                                     | Atopic dermatitis after 3 months, using SCORAD but authors state no differences between the two groups                                            | -   | Not relevant   | Part-funded by Mead Johnson<br>Author(s) not affiliated to formula industry        |
| NCT01285830(8)     | Neocate Syneo (UK)        | Gut microbiota dysbiosis in early infancy may delay oral tolerance, which can play an important role in the development of immune related conditions such as food allergy and atopic dermatitis | No. Trial is an RCT but this is an observational study looking at infants with and without IgE eczema | Infants with and without eczema                                                    | Both looked at probiotics, but different probiotics used in claim and in trial                                                                    | Consistent with claim                                     | Lower diversity of total gut microbiota in infants with eczema at age 1 month and 12 months                                                       | -   | Not relevant   | Part-funded by Biogaia<br>Author(s) not affiliated to probiotic industry           |

| Trial registration | Product in claim                       | Claims cited to trial reference                                                                                                                                                                                  | Claim related to randomised comparison?               | Relevance of trial population                                                                      | Relevance of trial intervention                                                 | Relevance of trial comparator                                  | Relevance of trial outcome                                                                                                                          | ROB  | Key ROB issues                                                                                                      | Trial conflict of interest                                     |
|--------------------|----------------------------------------|------------------------------------------------------------------------------------------------------------------------------------------------------------------------------------------------------------------|-------------------------------------------------------|----------------------------------------------------------------------------------------------------|---------------------------------------------------------------------------------|----------------------------------------------------------------|-----------------------------------------------------------------------------------------------------------------------------------------------------|------|---------------------------------------------------------------------------------------------------------------------|----------------------------------------------------------------|
| NCT00655720(9)     | Nutramigen 2 DHA hypoallergen (Norway) | Nutramigen is documented to promote healthy growth and development of children with cow-milk allergy                                                                                                             | No. Comparator was non randomised CDC growth chart    | Claim regarding children with CMA. Study looks at healthy infants fully formula fed at age 14 days | Same - LGG                                                                      | Claim implies CDC growth chart. Trial uses formula without LGG | Mean weight for all participants fell between the 25th - 75th centiles on the CDC weight-for-age growth chart                                       | -    | Not relevant                                                                                                        | Funded by Mead-Johnson<br>Author(s) affiliated to Mead-Johnson |
| NCT01634490(10)    | Nutramigen with LGG (UK)               | Clinical evidence demonstrates that the combination of Nutramigen with LGG® accelerates the return to milk† and reduces the incidence of other allergic manifestations‡ in infants with cow's milk allergy (CMA) | No. Open non randomised trial                         | Same                                                                                               | Same - EHCF with LGG                                                            | Consistent with claim                                          | The rate of children acquiring oral tolerance to CMP in intervention group after 12 months was significantly higher (P <0.05)                       | -    | Not relevant                                                                                                        | No funder stated<br>Authors declare no conflict of interest    |
| NCT01808105(11)    | SMA pro (UK)                           | Research suggests that infants fed a formula supplemented with structurally identical HMO 2'FL had immune markers closer to breast-fed infants                                                                   | No. Comparison is with observational breastfed group. | Same - but in trial all subjects were exclusively formula fed by day 5, which is not common        | Same - 2'FL. Though not clear in trial which 2-FL formula is being referred to. | Consistent with claim                                          | Similar cytokine profile with breastmilk. Though no equivalence analysis shown.                                                                     | -    | Not relevant                                                                                                        | Funded by Abbott<br>Author(s) affiliated to Abbott             |
| NCT01808105(11)    | Similac Alimentum (South Africa)       | Contains 2'-FL* for immune support in the gut and beyond                                                                                                                                                         | Yes                                                   | Same - but in trial all subjects were exclusively formula fed by day 5, which is not common        | Same - 2'FL. Though not clear in trial which 2-FL formula is being referred to. | Consistent with claim                                          | Multiple immune changes reported, although their relationship to infant health is not clear. Stool IgA assessments undertaken but not yet reported. | High | >60% of randomised subjects not included in analysis. Outcomes not mentioned in clinical trial registration record. | Funded by Abbott<br>Author(s) affiliated to Abbott             |



| Trial registration | Product in claim                                                                                                         | Claims cited to trial reference                                                                           | Claim related to randomised comparison? | Relevance of trial population                                                               | Relevance of trial intervention                                                 | Relevance of trial comparator                                                                  | Relevance of trial outcome                                                                                                                                                                                                     | ROB  | Key ROB issues                                                                                                      | Trial conflict of interest                                     |
|--------------------|--------------------------------------------------------------------------------------------------------------------------|-----------------------------------------------------------------------------------------------------------|-----------------------------------------|---------------------------------------------------------------------------------------------|---------------------------------------------------------------------------------|------------------------------------------------------------------------------------------------|--------------------------------------------------------------------------------------------------------------------------------------------------------------------------------------------------------------------------------|------|---------------------------------------------------------------------------------------------------------------------|----------------------------------------------------------------|
| NCT01808105(11)    | Enfamil Neuro Pro Infant Gentlease, Similac Pro-Advance 20, Similac Pro Sensitive and Similac Pro Total Comfort 20 (USA) | 2'-FL HMO: Shown to support a baby's immune health                                                        | Yes                                     | Same - but in trial all subjects were exclusively formula fed by day 5, which is not common | Same - 2'FL. Though not clear in trial which 2-FL formula is being referred to. | Consistent with claim                                                                          | Multiple immune changes reported, although their relationship to infant health is not clear.                                                                                                                                   | High | >60% of randomised subjects not included in analysis. Outcomes not mentioned in clinical trial registration record. | Funded by Abbott<br>Author(s) affiliated to Abbott             |
| NCT00712608 (12)   | Enfamil Reguline (USA)                                                                                                   | Exclusive NaturalDefense Dual Prebiotic blend clinically proven to promote beneficial bacteria in the gut | Yes                                     | Same – but in trial all subjects were exclusively formula fed by day 16                     | Same – PDX and GOS                                                              | Enfamil LIPIL used in trial, which is not hydrolysed. Enfamil Reguline is partially hydrolysed | No relevant outcome presented                                                                                                                                                                                                  | High | 10-20% of randomised participants appear to be inappropriately excluded from analysis                               | Funded by Mead Johnson<br>Author(s) affiliated to Mead Johnson |
| NCT00712608 (12)   | Enfamil Reguline (USA)                                                                                                   | Exclusive NaturalDefense Dual Prebiotic blend clinically proven to... help support gut health             | Yes                                     | Same – but in trial all subjects were exclusively formula fed by day 16                     | Same – PDX and GOS                                                              | Enfamil LIPIL used in trial, which is not hydrolysed. Enfamil Reguline is partially hydrolysed | Significant increase in stool frequency reported at 1 of 4 timepoints; and significantly looser stools reported at 2 of 4 timepoints. No differences reported in growth, gassiness, fussiness or formula intake between groups | High | 10-20% of randomised participants appear to be inappropriately excluded from analysis                               | Funded by Mead Johnson<br>Author(s) affiliated to Mead Johnson |

| Trial registration  | Product in claim                           | Claims cited to trial reference                                                                     | Claim related to randomised comparison? | Relevance of trial population                                                                                                        | Relevance of trial intervention                                                                                | Relevance of trial comparator                                                                                   | Relevance of trial outcome                                               | ROB           | Key ROB issues                                                                                                       | Trial conflict of interest                                           |
|---------------------|--------------------------------------------|-----------------------------------------------------------------------------------------------------|-----------------------------------------|--------------------------------------------------------------------------------------------------------------------------------------|----------------------------------------------------------------------------------------------------------------|-----------------------------------------------------------------------------------------------------------------|--------------------------------------------------------------------------|---------------|----------------------------------------------------------------------------------------------------------------------|----------------------------------------------------------------------|
| NCT00941564(13,14)  | Similac Advance (South Africa)             | No palm oil foreasy digestion                                                                       | Yes                                     | Same                                                                                                                                 | Same                                                                                                           | Nestle Nan Pro which contained palm olein, palm kernel, canola oils and higher levels of calcium and phosphorus | Trial reports differences in calcium absorption and in stool consistency | Some concerns |                                                                                                                      | Funded by Abbott<br>Author(s) affiliated to Abbott                   |
| NCT01119170 (15,16) | Nan SpecialPro Lactose Free (South Africa) | Contains L. reuteri (10 <sup>6</sup> cfu/g) which promotes healthy gut microbiota                   | Yes                                     | Same – but in trial almost all subjects appear to have been exclusively formula fed from less than 72 hours age, which is not common | Same                                                                                                           | Formula used in trial not stated, and no mention of formula being lactose free                                  | Bifidobacteria and Lactobacilli reported                                 | High          | ≥34% of missing outcome data relevant outcomes, for unclear reasons, with asymmetric losses between treatment groups | Funded by Nestlé<br>Author(s) affiliated to Nestlé                   |
| NCT00893711 (17)    | Nan SpecialPro Sensitive (South Africa)    | Active Limosilactobacillus reuteri cultures have a proven anti-colic effect and improve gut comfort | Yes                                     | Same                                                                                                                                 | Trial intervention was an unspecified dose of L. reuteri in oil administered as drops 30 minutes before a feed | Sunflower oil and medium-chain triglyceride oil                                                                 | Crying time reported in manuscript                                       | High          | No prospective trial registration and incomplete reporting of crying time outcomes                                   | Funded by BioGaia AB<br>Author(s) not affiliated to formula industry |

| Trial registration | Product in claim                  | Claims cited to trial reference                                                                                                                   | Claim related to randomised comparison? | Relevance of trial population | Relevance of trial intervention                                                                                | Relevance of trial comparator                                      | Relevance of trial outcome                                                                                    | ROB  | Key ROB issues                                                                                                                                                                                   | Trial conflict of interest                                           |
|--------------------|-----------------------------------|---------------------------------------------------------------------------------------------------------------------------------------------------|-----------------------------------------|-------------------------------|----------------------------------------------------------------------------------------------------------------|--------------------------------------------------------------------|---------------------------------------------------------------------------------------------------------------|------|--------------------------------------------------------------------------------------------------------------------------------------------------------------------------------------------------|----------------------------------------------------------------------|
| NCT00893711(17)    | Nan Lactogen 1 (South Africa)     | Limosilactobacillus reuteri (13 <sup>6</sup> cfu/100 ml) is the only proven lactic acid producing culture to reduce crying time in colicky babies | Yes                                     | Same                          | Trial intervention was an unspecified dose of L. reuteri in oil administered as drops 30 minutes before a feed | Sunflower oil and medium-chain triglyceride oil                    | Crying time reported in manuscript                                                                            | High | No prospective trial registration and incomplete reporting of crying time outcomes                                                                                                               | Funded by BioGaia AB<br>Author(s) not affiliated to formula industry |
| NCT00893711(17)    | Nan Lactogen 1 (South Africa)     | Limosilactobacillus reuteri (13 <sup>6</sup> cfu/100 ml) is the only proven lactic acid producing culture to reduce crying time in colicky babies | Yes                                     | Same                          | Trial intervention was an unspecified dose of L. reuteri in oil administered as drops 30 minutes before a feed | Sunflower oil and medium-chain triglyceride oil                    | No description of colonising the digestive tract in publication                                               | High | No prospective trial registration and incomplete outcome reporting                                                                                                                               | Funded by BioGaia AB<br>Author(s) not affiliated to formula industry |
| NCT02456831 (18)   | Similac Isomil soy (Saudi Arabia) | Clinically shown to reduce fussiness, gas in infants experiencing general intolerance on cow's milk formula                                       | Yes                                     | Same                          | Trial intervention was similac isomil soy formula with iron                                                    | Trial comparators were 5% and 10% hydrolysed soya formula products | Trial reports non-significant differences between groups in fussiness and gas in favour of Similac Isomil soy | High | No prospective trial registration. Over 30% of randomised participants missing from analysis, at least some of which appears to be related to the outcomes and not intention to treat analysis.. | Funded by Abbott<br>Author(s) affiliated to Abbott                   |

| Trial registration | Product in claim                                                                                        | Claims cited to trial reference                                                                                           | Claim related to randomised comparison? | Relevance of trial population | Relevance of trial intervention | Relevance of trial comparator                                                                                                                        | Relevance of trial outcome                                                                   | ROB  | Key ROB issues                                                                                | Trial conflict of interest                                     |
|--------------------|---------------------------------------------------------------------------------------------------------|---------------------------------------------------------------------------------------------------------------------------|-----------------------------------------|-------------------------------|---------------------------------|------------------------------------------------------------------------------------------------------------------------------------------------------|----------------------------------------------------------------------------------------------|------|-----------------------------------------------------------------------------------------------|----------------------------------------------------------------|
| NCT00503789(19)    | Enfamil AR and Enfamil Reguline (USA)                                                                   | Prebiotic blend... to promote soft stools; help support gut health and promote soft, comfortable stools in 1 week         | Yes                                     | Same                          | Same                            | Enfamil LIPIL used in trial, which is not hydrolysed or thickened. Enfamil Reguline is partially hydrolysed and Enfamil AR includes starch thickener | Stool characteristics and bifidobacterial/lactobacilli reported in manuscripts               | High | Significant number of participants appear to have been inappropriately excluded from analysis | Funded by Mead Johnson<br>Author(s) affiliated to Mead Johnson |
| NCT00503789(19,20) | Enfamil Neuro Pro Infant, Enfamil Enspire Infant, Enfamil Infant, Enfamil AR and Enfamil Reguline (USA) | Prebiotic blend... support immune health by promoting the growth of beneficial bacteria (bifidobacteria and lactobacilli) | Yes                                     | Same                          | Same                            | Enfamil LIPIL used in trial, which is not hydrolysed or thickened. Enfamil Reguline is partially hydrolysed and Enfamil AR includes starch thickener | Stool bifidobacteria and lactobacilli reported in manuscripts. Immune outcomes not reported. | High | Significant number of participants appear to have been inappropriately excluded from analysis | Funded by Mead Johnson<br>Author(s) affiliated to Mead Johnson |

| <b>Trial registration</b> | <b>Product in claim</b>         | <b>Claims cited to trial reference</b>                                                      | <b>Claim related to randomised comparison?</b> | <b>Relevance of trial population</b> | <b>Relevance of trial intervention</b> | <b>Relevance of trial comparator</b>                                                                                                                                      | <b>Relevance of trial outcome</b>                                                                                                                               | <b>ROB</b>    | <b>Key ROB issues</b>                                                                              | <b>Trial conflict of interest</b>                                                  |
|---------------------------|---------------------------------|---------------------------------------------------------------------------------------------|------------------------------------------------|--------------------------------------|----------------------------------------|---------------------------------------------------------------------------------------------------------------------------------------------------------------------------|-----------------------------------------------------------------------------------------------------------------------------------------------------------------|---------------|----------------------------------------------------------------------------------------------------|------------------------------------------------------------------------------------|
| NTR2726(21)               | Aptamil Premium (South Africa)  | Supports the natural development of a healthy microbiota                                    | Yes                                            | Same                                 | Same                                   | Aptamil premium is a partially hydrolysed, lactose-reduced formula with prebiotic. Trial intervention was a prebiotic supplemented, non-hydrolysed, lactose-based formula | Stool bifidobacteria and other genera reported in manuscript                                                                                                    | High          | Per protocol analysis on less than half of randomised participants                                 | Funded by Danone Nutricia<br>Author(s) affiliated to Danone Nutricia               |
| NTR2838(22)               | Aptamil Prosyneo (South Africa) | Restores balance of challenged gut microbiota                                               | Yes                                            | Same                                 | Same                                   | Same                                                                                                                                                                      | Stool bifidobacteria count                                                                                                                                      | Some concerns |                                                                                                    | Funded by Danone Nutricia<br>Author(s) affiliated to Danone Nutricia               |
| ACTRN12608000047392(23)   | Nanny (Russia)                  | The formation of healthy digestion and normal microbiocenosis (the role of food components) | Yes                                            | Same                                 | Same - goats milk                      | Consistent with claim                                                                                                                                                     | Lachnospiraceae compositions of the faeces of babies fed goat-milk were more similar to those of breast milk-fed infants than were those of cow milk-fed babies | High          | 70% of randomised subjects not included in analysis. No imputation or selection process described. | Funded by Dairy Goat Cooperative<br>Author(s) affiliated to Dairy Goat Cooperative |

| Trial registration      | Product in claim                          | Claims cited to trial reference                                                                                                                                       | Claim related to randomised comparison? | Relevance of trial population | Relevance of trial intervention | Relevance of trial comparator | Relevance of trial outcome                                                                              | ROB  | Key ROB issues                                                                                                                                                                                                                                                                                                                     | Trial conflict of interest                                                                                            |
|-------------------------|-------------------------------------------|-----------------------------------------------------------------------------------------------------------------------------------------------------------------------|-----------------------------------------|-------------------------------|---------------------------------|-------------------------------|---------------------------------------------------------------------------------------------------------|------|------------------------------------------------------------------------------------------------------------------------------------------------------------------------------------------------------------------------------------------------------------------------------------------------------------------------------------|-----------------------------------------------------------------------------------------------------------------------|
| NCT01891916(24)         | Enfamil Nutramigen with Enflora LGG (USA) | Nutramigen with Probiotic LGG is the only formula with two published studies showing the reduction in the incidence of allergic manifestations like asthma and eczema | Yes                                     | Same                          | Same - LGG                      | Consistent with claim         | Reduced absolute risk difference for the occurrence of at least 1 allergic manifestation over 36 months | High | 28% missing data from total randomised subjects, 18% due to exclusion at diagnostic DBPCFC. Post-randomisation exclusion of participants based on DBPCFC is not mentioned in trial registration or protocol.                                                                                                                       | Independently funded, formula supplied by Mead Johnson<br><br>Author conflict of interest related to formula industry |
| ACTRN12610000566033(25) | Enfamil Nutramigen with Enflora LGG (USA) | Nutramigen with Probiotic LGG is the only formula with two published studies showing the reduction in the incidence of allergic manifestations like asthma and eczema | Yes                                     | Same                          | Same - LGG                      | Consistent with claim         | Allergic manifestations like asthma and eczema are not reported in the cited publication                | High | 31% of subjects missing from analysis. Participants were excluded after randomisation based on the outcome of a DBPCFC. It is not clear whether this was a justified exclusion of non-eligible participants. In the manuscript and the retrospective clinical trial registry, the relevant inclusion criterion is 'suspected CMA'. | Part-funded by Mead Johnson<br><br>Author(s) not affiliated to formula industry                                       |
| ACTRN12610000566033(25) | Enfamil Nutramigen with Enflora LGG (USA) | Fast return to milk protein. Helps infants consume milk protein without an allergic reaction in as little as 6 months of feeding                                      | Yes                                     | Same                          | Same - LGG                      | Consistent with claim         | Higher probability of acquiring tolerance to CMP at 6 and 12 months in intervention group               | High | 31% of subjects missing from analysis. Participants were excluded after randomisation based on the outcome of a DBPCFC. It is not clear whether this was a justified exclusion of non-eligible participants. In the                                                                                                                | Part-funded by Mead Johnson<br><br>Author(s) not affiliated to formula industry                                       |

| Trial registration      | Product in claim                 | Claims cited to trial reference                                                                                                                                                                                                                                                                                                               | Claim related to randomised comparison? | Relevance of trial population | Relevance of trial intervention                                                                                                                                                       | Relevance of trial comparator | Relevance of trial outcome                                                                           | ROB  | Key ROB issues                                                                                                                                                                                                                                                                                                                                                                                                                                           | Trial conflict of interest                                                                                                                          |
|-------------------------|----------------------------------|-----------------------------------------------------------------------------------------------------------------------------------------------------------------------------------------------------------------------------------------------------------------------------------------------------------------------------------------------|-----------------------------------------|-------------------------------|---------------------------------------------------------------------------------------------------------------------------------------------------------------------------------------|-------------------------------|------------------------------------------------------------------------------------------------------|------|----------------------------------------------------------------------------------------------------------------------------------------------------------------------------------------------------------------------------------------------------------------------------------------------------------------------------------------------------------------------------------------------------------------------------------------------------------|-----------------------------------------------------------------------------------------------------------------------------------------------------|
| ACTRN12610000566033(25) | Nutramigen with LGG (UK)         | 8 out of 10 infants get back to milk after 12 months of use                                                                                                                                                                                                                                                                                   | Yes                                     | Same                          | Same - LGG                                                                                                                                                                            | Consistent with claim         | Higher probability of acquiring tolerance to CMP at 6 and 12 months in intervention group            | High | manuscript and the retrospective clinical trial registry, the relevant inclusion criterion is 'suspected CMA'.<br><br>31% of subjects missing from analysis. Participants were excluded after randomisation based on the outcome of a DBPCFC. It is not clear whether this was a justified exclusion of non-eligible participants. In the manuscript and the retrospective clinical trial registry, the relevant inclusion criterion is 'suspected CMA'. | Part-funded by Mead Johnson<br><br>Author(s) not affiliated to formula industry                                                                     |
| NCT00338689(26)         | SMA Advanced Infant formula (UK) | Available evidence from The Childhood Obesity Project Study, a large independent Randomised Controlled Trial (RCT), suggests that higher protein intakes increase plasma and tissue levels of insulin-releasing amino acids and of insulin and insulin-like growth factor 1 (IGF-1), and thereby increase weight gain and adipogenic activity | Yes                                     | Same                          | Both claim and study relate to low protein formula. However in trial, both infant and follow on formula is used, with differing protein contents. Unclear which product used in trial | Consistent with claim         | z-score for estimated difference of BMI between formula groups was 0.23 at 24 months (CI 0.089-0.36) | High | 44% missing data at 24 months. At least 15% excluded inappropriately.                                                                                                                                                                                                                                                                                                                                                                                    | Independent funding and authorship with no relevant conflict of interests declared<br><br>Danone were a partner in the project and provided formula |

| Trial registration | Product in claim                                                  | Claims cited to trial reference                                                                                                                                                                                                                                                                                                               | Claim related to randomised comparison? | Relevance of trial population | Relevance of trial intervention                                                                                           | Relevance of trial comparator | Relevance of trial outcome                                                                                               | ROB  | Key ROB issues                                                                                                                                      | Trial conflict of interest                                                                                                                        |
|--------------------|-------------------------------------------------------------------|-----------------------------------------------------------------------------------------------------------------------------------------------------------------------------------------------------------------------------------------------------------------------------------------------------------------------------------------------|-----------------------------------------|-------------------------------|---------------------------------------------------------------------------------------------------------------------------|-------------------------------|--------------------------------------------------------------------------------------------------------------------------|------|-----------------------------------------------------------------------------------------------------------------------------------------------------|---------------------------------------------------------------------------------------------------------------------------------------------------|
| NCT00338689(27)    | SMA Advanced First infant milk and SMA Pro First infant milk (UK) | Available evidence from The Childhood Obesity Project Study, a large independent Randomised Controlled Trial (RCT), suggests that higher protein intakes increase plasma and tissue levels of insulin-releasing amino acids and of insulin and insulin-like growth factor I (IGF-I), and thereby increase weight gain and adipogenic activity | Yes                                     | Same                          | Same - low protein formula. However in trial, both infant and follow on formula is used, with differing protein contents. | Consistent with claim         | Reduced BMI z scores at 6 years                                                                                          | High | 52% missing data at 6 years. At least 16% excluded inappropriately.                                                                                 | Independent funding and authorship with no declared author conflict of interests<br><br>Danone were a partner in the project and provided formula |
| NCT00624689(28)    | Enfamil Enspire Infant Gentlease (USA)                            | Milk fat globule membrane (MFGM) provides brain-building benefits and is shown to support cognitive outcomes at 12 months                                                                                                                                                                                                                     | Yes                                     | Same                          | Same - MFGM.                                                                                                              | Consistent with claim         | Improved cognitive development at 12 months of age, using the Bayley Scales of Infant and Toddler Development (p=0.008). | High | 12% of randomised subjects excluded from analysis, unclear reasons. Not clear if outcome assessors blinded to intervention at the 12 month outcome. | Part-funded by Semper AB<br><br>Author(s) not affiliated to formula industry                                                                      |
| NCT00624689(28)    | Semper Baby Nutra defence (Russia)                                | Clinically proven: the use of milk formula with MFGM & Milk fat ... significantly increases the cognitive development of infants compared with infants who received the milk formula without MFGM                                                                                                                                             | Yes                                     | Same                          | Same - MFGM.                                                                                                              | Consistent with claim         | Improved cognitive development at 12 months of age, using the Bayley Scales of Infant and Toddler Development (p=0.008). | High | 12% of randomised subjects excluded from analysis, unclear reasons. Not clear if outcome assessors blinded to intervention at the 12 month outcome. | Part-funded by Semper AB<br><br>Author(s) not affiliated to formula industry                                                                      |



| Trial registration | Product in claim                   | Claims cited to trial reference                                                                                                                                                     | Claim related to randomised comparison? | Relevance of trial population | Relevance of trial intervention | Relevance of trial comparator | Relevance of trial outcome                                                                                                                       | ROB  | Key ROB issues                                                                                                                                                                                                 | Trial conflict of interest                                               |
|--------------------|------------------------------------|-------------------------------------------------------------------------------------------------------------------------------------------------------------------------------------|-----------------------------------------|-------------------------------|---------------------------------|-------------------------------|--------------------------------------------------------------------------------------------------------------------------------------------------|------|----------------------------------------------------------------------------------------------------------------------------------------------------------------------------------------------------------------|--------------------------------------------------------------------------|
| NCT00624689(29)    | Semper Baby Nutra defence (Russia) | Clinically proven: the use of milk formula with MFGM & Milk fat reduces the frequency of infections ... of infants compared with infants who received the milk formula without MFGM | Yes                                     | Same                          | Same - MFGM.                    | Consistent with claim         | Lower incidence of acute otitis media up to age 6 months (p=0.034).                                                                              | High | High risk of bias in selecting results. Of the 6 infections looked at, only AOM had a favourable result - and this was only at 6 months. At 12 months there were no favourable results which support the claim | Part-funded by Semper AB<br>Author(s) not affiliated to formula industry |
| NCT00664768(30)    | Neocate Syneo (USA)                | Clinically shown to: Support growth and development                                                                                                                                 | Yes                                     | Same                          | Same - probiotics               | Consistent with claim         | Week 16 growth measurements with 90% confidence intervals were similar to the control group                                                      | High | Growth data appear to be selectively reported, without presenting the per protocol analysis which would be usual for a growth equivalence study                                                                | Funded by Danone Nutricia<br>Author(s) affiliated to Danone Nutricia     |
| NCT00664768(30)    | Neocate Syneo (USA)                | Clinically shown to: Effectively resolve food allergy symptoms                                                                                                                      | Yes                                     | Same                          | Same - probiotics               | Consistent with claim         | Study formulas were well accepted. Severity of allergy symptoms decreased with time and no significant differences were observed between groups. | High | No data presented and these outcomes were not stated in the trial registration record.                                                                                                                         | Funded by Danone Nutricia<br>Author(s) affiliated to Danone Nutricia     |
| NCT00664768(30)    | Neocate Syneo (UK)                 | Influences the diversity and abundance of gut microbiota                                                                                                                            | Yes                                     | Same                          | Same - probiotics               | Consistent with claim         | Increased bifidobacteria as mean % of total bacteria in intervention group at 16 weeks (p<0.001)                                                 | High | Inappropriate ITT analysis - 34% of subjects excluded. Unclear reasons for all exclusions. At least 9% were inappropriately excluded for ITT analysis                                                          | Funded by Danone Nutricia<br>Author(s) affiliated to Danone Nutricia     |

| Trial registration | Product in claim                                | Claims cited to trial reference                        | Claim related to randomised comparison? | Relevance of trial population | Relevance of trial intervention | Relevance of trial comparator | Relevance of trial outcome                                                                                                                                | ROB  | Key ROB issues                                                                                                                                                                                                                                                                    | Trial conflict of interest                                     |
|--------------------|-------------------------------------------------|--------------------------------------------------------|-----------------------------------------|-------------------------------|---------------------------------|-------------------------------|-----------------------------------------------------------------------------------------------------------------------------------------------------------|------|-----------------------------------------------------------------------------------------------------------------------------------------------------------------------------------------------------------------------------------------------------------------------------------|----------------------------------------------------------------|
| NCT00716105(31)    | SMA Pro Follow-on (UK)                          | Specially designed to help support appropriate growth  | Yes                                     | Same                          | Same - low protein formula      | Consistent with claim         | Weight gain (g/day) from 3 to 6 months was similar in the intervention and control groups (EXPL-CTRL -0.84 g/day; 95% confidence interval - 2.25 to 0.57) | High | Analyses are all undertaken on the ITT dataset, without a PP analysis, which is unusual for a non-inferiority trial and suggests selection of the result on the basis of the findings.                                                                                            | Funded by Nestlé<br>Author(s) affiliated to Nestlé             |
| NCT00753818(32)    | Pregestimil Lipil (UK)                          | clinically proven to support brain and eye development | Yes                                     | Same                          | Same - DHA                      | Consistent with claim         | Visual evoked potential (VEP) visual acuity at 12 months better in intervention group (p < 0.001)                                                         | High | Per protocol analysis used in study instead of ITT. 30% of data missing                                                                                                                                                                                                           | Funded by Mead-Johnson<br>Author(s) affiliated to Mead-Johnson |
| NCT00753818(33)    | Enfamil Infant and other Enfamil products (USA) | Support cognitive and visual development               | Yes                                     | Same                          | Same - DHA                      | Consistent with claim         | Improved cognitive development in intervention group - assessed by rule-learning and inhibition tasks and the Peabody Picture Vocabulary Test at 5 years  | High | Not an appropriate ITT analysis. Over 40% of subjects excluded inappropriately. 9 different cognitive assessment scales used at 1-4 timepoints. No difference was seen for most assessments and at second study site. Primary assessment and timepoint of interest not specified. | Funded by Mead-Johnson<br>Author(s) affiliated to Mead-Johnson |

| Trial registration | Product in claim                                | Claims cited to trial reference                             | Claim related to randomised comparison? | Relevance of trial population                                                        | Relevance of trial intervention | Relevance of trial comparator | Relevance of trial outcome                                                                                                                               | ROB  | Key ROB issues                                                                                                                                                                                                                                                                    | Trial conflict of interest                                     |
|--------------------|-------------------------------------------------|-------------------------------------------------------------|-----------------------------------------|--------------------------------------------------------------------------------------|---------------------------------|-------------------------------|----------------------------------------------------------------------------------------------------------------------------------------------------------|------|-----------------------------------------------------------------------------------------------------------------------------------------------------------------------------------------------------------------------------------------------------------------------------------|----------------------------------------------------------------|
| NCT00753818(33)    | Enfamil Infant and other Enfamil products (USA) | Promote long-term cognitive outcomes through 5 years of age | Yes                                     | Same                                                                                 | Same - DHA                      | Consistent with claim         | Improved cognitive development in intervention group - assessed by rule-learning and inhibition tasks and the Peabody Picture Vocabulary Test at 5 years | High | Not an appropriate ITT analysis. Over 40% of subjects excluded inappropriately. 9 different cognitive assessment scales used at 1-4 timepoints. No difference was seen for most assessments and at second study site. Primary assessment and timepoint of interest not specified. | Funded by Mead-Johnson<br>Author(s) affiliated to Mead-Johnson |
| NCT00753818(33)    | Pregestamil Lipil (UK)                          | clinically proven to support brain and eye development      | Yes                                     | Same                                                                                 | Same - DHA                      | Consistent with claim         | Improved cognitive development in intervention group - assessed by rule-learning and inhibition tasks and the Peabody Picture Vocabulary Test at 5 years | High | Not an appropriate ITT analysis. Over 40% of subjects excluded inappropriately. 9 different cognitive assessment scales used at 1-4 timepoints. No difference was seen for most assessments and at second study site. Primary assessment and timepoint of interest not specified. | Funded by Mead-Johnson<br>Author(s) affiliated to Mead-Johnson |
| NCT00820833(34)    | SMA pro (UK)                                    | Specially designed to help support appropriate growth       | Yes                                     | Study evaluated infants of overweight mothers. Product in claim aimed at all infants | Same - low protein formula      | Consistent with claim         | Unclear what is meant by 'appropriate growth'. Trial shows reduced weight gain between 3-6 months of age as desired outcome of intervention (p = 0.024)  | High | No mention of allocation sequence concealment. 17% missing data from randomised subjects. Study retrospectively registered.                                                                                                                                                       | Funded by Nestlé<br>Author(s) affiliated to Nestlé             |

| Trial registration | Product in claim        | Claims cited to trial reference                                                                                                                                                                | Claim related to randomised comparison? | Relevance of trial population                                                             | Relevance of trial intervention                                                             | Relevance of trial comparator | Relevance of trial outcome                                                                                                                                      | ROB  | Key ROB issues                                                                                                                                                                 | Trial conflict of interest                                                     |
|--------------------|-------------------------|------------------------------------------------------------------------------------------------------------------------------------------------------------------------------------------------|-----------------------------------------|-------------------------------------------------------------------------------------------|---------------------------------------------------------------------------------------------|-------------------------------|-----------------------------------------------------------------------------------------------------------------------------------------------------------------|------|--------------------------------------------------------------------------------------------------------------------------------------------------------------------------------|--------------------------------------------------------------------------------|
| NCT01215656(35)    | Hipp Combiotic (Russia) | Inspired by breast milk, breast milk probiotics, for the immune system, for brain development. The effectiveness of the combination of L. fermentum hereditum and GOS are clinically confirmed | Yes                                     | Same                                                                                      | Same - L. fermentum. Unclear which brand used in trial though "standard powdered follow-on" | Consistent with claim         | Reduced incidence in GI infections (p=0.032) and URTIs (p=0.026) between age 6-12 months                                                                        | High | Inappropriate ITT analysis - 13% subjects excluded.                                                                                                                            | Funded by Puleva Food<br>Author(s) affiliated to Puleva Food                   |
| NCT01346644(36)    | Hipp Combiotic (Russia) | Inspired by breast milk, breast milk probiotics, for the immune system, for brain development. The effectiveness of the combination of L. fermentum hereditum and GOS are clinically confirmed | Yes                                     | Same                                                                                      | Same - L. fermentum. Unclear which brand used in trial                                      | Consistent with claim         | The incidence rate of gastrointestinal infections in infants of the control group was 3 times higher than in the probiotic group (p = 0.018) at 6 months of age | High | End point recorded in registry as 36 months, but paper only showed results to 6 months. Another associated paper which did follow up to 36 months showed unfavourable results. | Funded by Puleva Food and HiPP<br>Author(s) affiliated to Puleva Food and HiPP |
| NCT01569776(37)    | SMA Alfamino (UK)       | Severe symptom management (in context of allergy)                                                                                                                                              | Yes                                     | Same                                                                                      | Same - amino acid formula                                                                   | Consistent with claim         | Hypoallergenicity measured by 2 x DBPCFCs two weeks apart (crossover trial)                                                                                     | High | 10.8% missing data due to non-adherence. Only simple per protocol analysis used                                                                                                | Funded by Nestlé<br>Author(s) affiliated to Nestlé                             |
| NCT01583673(38)    | Alfamino Infant (USA)   | Clinically demonstrated in healthy infants to promote adequate growth.                                                                                                                         | Yes                                     | Same                                                                                      | Unclear if same brand in trial as in claim                                                  | Consistent with claim         | Mean WHO weight-for-age z-scores were negative (<0) up to 4 months of age, however weight gain was equivalent between intervention and control                  | High | 48% missing data. Poor adherence to intervention with no analysis to estimate the effect of adhering to intervention                                                           | Funded by Nestlé<br>Author(s) affiliated to Nestlé                             |
| NCT01583673(38)    | SMA Alfamino (UK)       | SMA Alfamino® is nutritionally complete* and is designed to support growth, tolerance and absorption in the most                                                                               | Yes                                     | Claim implies product is aimed for children with allergies but trial uses healthy infants | Unclear if same brand in trial as in claim                                                  | Consistent with claim         | Mean WHO weight-for-age z-scores were negative (<0) up to 4 months of age, however weight gain was equivalent                                                   | High | 48% missing data. Poor adherence to intervention with no analysis to estimate the effect of adhering to intervention                                                           | Funded by Nestlé<br>Author(s) affiliated to Nestlé                             |

| Trial registration | Product in claim                                               | Claims cited to trial reference                                                                                                                                                                                                                                                                                                                                                                                                          | Claim related to randomised comparison? | Relevance of trial population | Relevance of trial intervention                         | Relevance of trial comparator | Relevance of trial outcome                                                                                                                                                                                                                                                                           | ROB  | Key ROB issues                                                                                   | Trial conflict of interest                             |
|--------------------|----------------------------------------------------------------|------------------------------------------------------------------------------------------------------------------------------------------------------------------------------------------------------------------------------------------------------------------------------------------------------------------------------------------------------------------------------------------------------------------------------------------|-----------------------------------------|-------------------------------|---------------------------------------------------------|-------------------------------|------------------------------------------------------------------------------------------------------------------------------------------------------------------------------------------------------------------------------------------------------------------------------------------------------|------|--------------------------------------------------------------------------------------------------|--------------------------------------------------------|
| NCT01715246(39)    | NAN Supreme 1 (South Africa)                                   | challenging allergy conditions.<br><br>2'-FL and LNnT may help reduce the risk of diarrhoea                                                                                                                                                                                                                                                                                                                                              | Yes                                     | Same                          | Same - 2'Fl and LNnT. Unclear which brand used in trial | Consistent with claim         | between intervention and control<br><br>No significant difference between groups in proportion of stools in each consistency category, or in stool frequency. At 1 timepoint a single continuous measure of stool softness was significantly lower in the intervention group than the control group. | High | 17% of randomised participants excluded from analysis and only simple per protocol analysis used | Funded by Nestlé<br><br>Author(s) affiliated to Nestlé |
| NCT01715246(39)    | Signature ProCare with Dual HMO's, Non-GMO Infant Formula (US) | Human Milk Oligosaccharides (HMOs, not from human milk) are prebiotics that support baby's immunity ... by encouraging growth of beneficial bacteria in the gut. ProCare boosted 2'-FL HMO to a level that aligns with mother's milk and added LNnT, another HMO naturally occurring in breast milk. We chose them because studies show that these two abundant HMOs work better together to support baby's ... developing immune system | Yes                                     | Same                          | Same - 2'Fl and LNnT. Unclear which brand used in trial | Consistent with claim         | Statistically significant differences between groups in favour of the intervention in the specific outcomes bronchitis and lower respiratory tract infection, which were not specified in the trial registration                                                                                     | High | 17% of randomised participants excluded from analysis and only simple per protocol analysis used | Funded by Nestlé<br><br>Author(s) affiliated to Nestlé |

| Trial registration | Product in claim                                               | Claims cited to trial reference                                                                                                                                                                                                                                                                                                                                                                                                      | Claim related to randomised comparison? | Relevance of trial population | Relevance of trial intervention                         | Relevance of trial comparator | Relevance of trial outcome                                                                                                                                                            | ROB  | Key ROB issues                                                                                   | Trial conflict of interest                         |
|--------------------|----------------------------------------------------------------|--------------------------------------------------------------------------------------------------------------------------------------------------------------------------------------------------------------------------------------------------------------------------------------------------------------------------------------------------------------------------------------------------------------------------------------|-----------------------------------------|-------------------------------|---------------------------------------------------------|-------------------------------|---------------------------------------------------------------------------------------------------------------------------------------------------------------------------------------|------|--------------------------------------------------------------------------------------------------|----------------------------------------------------|
| NCT01715246(39)    | Signature ProCare with Dual HMO's, Non-GMO Infant Formula (US) | Human Milk Oligosaccharides (HMOs, not from human milk) are prebiotics that support baby's ... digestive health by encouraging growth of beneficial bacteria in the gut. ProCare boosted 2'-FLHMO to a level that aligns with mother's milk and added LNnT, another HMO naturally occurring in breast milk. We chose them because studies show that these two abundant HMOs work better together to support baby's digestive comfort | Yes                                     | Same                          | Same - 2'Fl and LNnT. Unclear which brand used in trial | Consistent with claim         | In a subgroup analysis the outcome colic was significantly less frequent at one timepoint in the intervention group. Colic was not specified as an outcome in the trial registration. | High | 17% of randomised participants excluded from analysis and only simple per protocol analysis used | Funded by Nestlé<br>Author(s) affiliated to Nestlé |
| NCT01715246(39)    | SMA Advanced First Infant Milk (UK)                            | Shown to be safe, well tolerated, and support a ge-appropriate growth                                                                                                                                                                                                                                                                                                                                                                | Yes                                     | Same                          | Same - 2'Fl and LNnT. Unclear which brand used in trial | Consistent with claim         | z scores for BMI and weight for age/length for age/HC for age did not differ significantly between the groups at any study visit and tracked closely with the WHO growth standards.   | High | 17% of randomised participants excluded from analysis and only simple per protocol analysis used | Funded by Nestlé<br>Author(s) affiliated to Nestlé |
| NCT01808105(11,40) | Similac Alimentum (UK)                                         | Help support the immune needs of infants with CMA in the gut and beyond.                                                                                                                                                                                                                                                                                                                                                             | Yes                                     | Same                          | Same - 2'FL. Unclear which brand used in trial          | Consistent with claim         | Similar cytokine profile with breastmilk. Though no equivalence analysis done and unclear how this 'helps support the immune needs of infants'                                        | High | 63% of randomised subjects excluded from analysis.                                               | Funded by Abbott<br>Author(s) affiliated to Abbott |

| Trial registration | Product in claim                  | Claims cited to trial reference                                                                                                                                                                                                                        | Claim related to randomised comparison? | Relevance of trial population | Relevance of trial intervention                                                                                        | Relevance of trial comparator | Relevance of trial outcome                                                                                      | ROB  | Key ROB issues                                                                                                                                                                                               | Trial conflict of interest                                                                                        |
|--------------------|-----------------------------------|--------------------------------------------------------------------------------------------------------------------------------------------------------------------------------------------------------------------------------------------------------|-----------------------------------------|-------------------------------|------------------------------------------------------------------------------------------------------------------------|-------------------------------|-----------------------------------------------------------------------------------------------------------------|------|--------------------------------------------------------------------------------------------------------------------------------------------------------------------------------------------------------------|-------------------------------------------------------------------------------------------------------------------|
| NCT01808105(11,40) | Similac Gold (Russia)             | The effectiveness is clinically proved: Similac Gold is the first in Russia infant formula with oligosaccharides of breast milk 2'-FL which is the unique ingredient, providing the immune system strengthening, previously found only in breast milk. | Yes                                     | Same                          | Same - 2'FL. Unclear which brand used in trial                                                                         | Consistent with claim         | Similar cytokine profile to breastmilk up to 4 months of age - unclear how this provides "immune strengthening" | High | 63% of randomised subjects excluded from analysis.                                                                                                                                                           | Funded by Abbott<br>Author(s) affiliated to Abbott                                                                |
| NCT01861600(41)    | SMA Comfort (UK)                  | SN-2-enriched fat blend to help promote softer stools                                                                                                                                                                                                  | Yes                                     | Same                          | Both claim and trial evaluate SN-2, but trial uses S-26 Gold according to trial registry, and claim is for SMA Comfort | Consistent with claim         | Softer stools at week 8. (20% more mushy soft stools, P= 0.026; 50% fewer formed stools, P=0.003).              | High | Trial registered 4 years after study start date. No mention of primary outcome (stool softness) in registry, so high risk of selecting results based on findings.                                            | Funded by Nestlé<br>Author(s) affiliated to Nestlé                                                                |
| NCT01891916(24)    | Nutramigen with LGG (UK)          | ~50% reduction in the incidence of ≥1 other allergic manifestation compared to Nutramigen alone during a period of 3 year                                                                                                                              | Yes                                     | Same                          | Yes - LGG                                                                                                              | Consistent with claim         | Reduced absolute risk difference for the occurrence of at least 1 allergic manifestation over 36 months         | High | 28% missing data from total randomised subjects, 18% due to exclusion at diagnostic DBPCFC. Post-randomisation exclusion of participants based on DBPCFC is not mentioned in trial registration or protocol. | Independently funded, formula supplied by Mead Johnson<br>Author conflict of interest related to formula industry |
| NTR2521(42)        | Cow&Gate Hungry first infant (UK) | Prebiotic oligosaccharides (scGOS/lcFOS* in a 9:1 ratio). This specific prebiotic blend encourages the growth and activity of beneficial bacteria in the infant gut, and improves stool frequency and consistency                                      | Yes                                     | Same                          | Same - prebiotics (FOS/GOS). unclear which brand used in trial - "commercially available" formula                      | Consistent with claim         | Softer stools at 17 weeks. Nothing on stool frequency                                                           | High | Number included in analysis unclear, but potentially 37% missing from randomised subjects. Some are inappropriate exclusions (adverse effects).                                                              | Funded by Nutricia Research<br>Author(s) affiliated to Nutricia Research                                          |

| Trial registration | Product in claim     | Claims cited to trial reference                                                                                                     | Claim related to randomised comparison? | Relevance of trial population | Relevance of trial intervention                                                                              | Relevance of trial comparator | Relevance of trial outcome                                                                   | ROB           | Key ROB issues                                                                                                                                                                                                                         | Trial conflict of interest                                                      |
|--------------------|----------------------|-------------------------------------------------------------------------------------------------------------------------------------|-----------------------------------------|-------------------------------|--------------------------------------------------------------------------------------------------------------|-------------------------------|----------------------------------------------------------------------------------------------|---------------|----------------------------------------------------------------------------------------------------------------------------------------------------------------------------------------------------------------------------------------|---------------------------------------------------------------------------------|
|                    |                      |                                                                                                                                     |                                         |                               |                                                                                                              |                               |                                                                                              |               | Unclear how missing data were handled                                                                                                                                                                                                  |                                                                                 |
| NTR3979(43)        | Neocate Syneo (UK)   | Typical gut microbiota of cow's milk allergic infants: lower levels of infant-like Bifidobacteria species                           | Unclear                                 | Same                          | Same - synbiotics (FOS + bifidobacterium)                                                                    | Consistent with claim         | Unclear outcome - we have assessed bifidobacteria as % of total bacteria at week 8 (p<0.001) | High          | 10% dropout from randomised subjects.<br>Outcome only reported as % of bacteria in stool samples. The absolute counts of bifidobacteria using FISH, which is specified in the trial registry as the primary outcome, was not reported. | Funded by Danone Nutricia<br>Author(s) affiliated to Danone Nutricia            |
| NCT01956682(44)    | SMA Anti-reflux (UK) | Unique combination of easily digestible starch and 100% whey, partially hydrolysed protein, to help manage reflux and regurgitation | Yes                                     | Same                          | Product in claim is SMA anti-reflux, and has no probiotics. Brand in trial is Nan AR and contains probiotics | Consistent with claim         | Reduced mean number of daily regurgitation episodes over 4 weeks (p< 0.0001)                 | Some concerns |                                                                                                                                                                                                                                        | Independently funded<br>Author conflict of interest related to formula industry |



| Trial registration | Product in claim                                 | Claims cited to trial reference                                                                                                                                                                         | Claim related to randomised comparison? | Relevance of trial population | Relevance of trial intervention                                                                                                                                            | Relevance of trial comparator | Relevance of trial outcome                                                   | ROB           | Key ROB issues | Trial conflict of interest                                                      |
|--------------------|--------------------------------------------------|---------------------------------------------------------------------------------------------------------------------------------------------------------------------------------------------------------|-----------------------------------------|-------------------------------|----------------------------------------------------------------------------------------------------------------------------------------------------------------------------|-------------------------------|------------------------------------------------------------------------------|---------------|----------------|---------------------------------------------------------------------------------|
| NCT01956682(44)    | NAN Specialpro Anti regurgitation (South Africa) | Contains a combination of ingredients: OPTIPRO®, Limosilactobacillus reuteri (lactic acid producing culture), corn starch and potato starch, scientifically proven for the management of regurgitation. | Yes                                     | Same                          | Product in claim is not hydrolysed. Trial intervention was partially hydrolysed whey formula                                                                               | Consistent with claim         | Reduced mean number of daily regurgitation episodes over 4 weeks (p< 0.0001) | Some concerns |                | Independently funded<br>Author conflict of interest related to formula industry |
| NCT01956682(44)    | NAN Specialpro Anti regurgitation (South Africa) | Active Lactobacillus reuteri cultures which have a proven anti-regurgitation effect and promote gut maturation.                                                                                         | Yes                                     | Same                          | Claim relates to Lactobacillus reuteri only. Trial intervention was multifaceted, combining partially hydrolysed whey formula, starch thickener and Lactobacillus reuteri. | Consistent with claim         | Reduced mean number of daily regurgitation episodes over 4 weeks (p< 0.0001) | Some concerns |                | Independently funded<br>Author conflict of interest related to formula industry |

AA, amino acid based infant formula; BM, breast milk; BMI, body mass index; CI, confidence interval; CDC, Centers for Disease Control and Prevention; CMA, cow's milk allergy; CMP, cow's milk protein; DBPCFC, double-blind placebo-controlled food challenge; DHA, docosahexaenoic acid; FOS, fructo-oligosaccharides; GOS, galacto-oligosaccharides; HC, head circumference; IgE, immunoglobulin E; ITT, intention to treat analysis; LGG, L. Rhamnosus GG; MFGM, milk fat globule membrane; NCT, national clinical trial number; PP, per protocol analysis; RCT, randomised controlled trial; SCORAD, SCORing Atopic Dermatitis scale; UK, United Kingdom; URTI, upper respiratory tract infection.

Supplementary Table 8. Risk of bias assessments of systematic reviews (ROBIS)

AA, arachidonic acid.; DHA, docosahexaenoic acid; IF, infant formula; LCPUFA, long-chain polyunsaturated fatty acid; ROBIS, Risk of Bias In Systematic Reviews; WHO, World Health Organization

| Study             | Claims cited to study reference                                                                               | Product/ingredient within scope of systematic review? | Does the study address claim?                                                                                                                                                                                                                                                                                                                                                                                                                                                                   | ROBIS risk of bias | Key ROBIS issues                                                                                                              | Was the study funded by a company that could benefit from the outcome? | Were one or more of the authors affiliated with a company that could benefit from the outcome? |
|-------------------|---------------------------------------------------------------------------------------------------------------|-------------------------------------------------------|-------------------------------------------------------------------------------------------------------------------------------------------------------------------------------------------------------------------------------------------------------------------------------------------------------------------------------------------------------------------------------------------------------------------------------------------------------------------------------------------------|--------------------|-------------------------------------------------------------------------------------------------------------------------------|------------------------------------------------------------------------|------------------------------------------------------------------------------------------------|
| Lasekan 2017 (45) | No palm oil for easy digestion.                                                                               | Yes                                                   | Unclear. The authors report results of a meta-analysis suggesting that NoPALM-based formulas may be associated with a softer stools compared with PALM-based. This is not necessarily indicative of being 'easy to digest'.                                                                                                                                                                                                                                                                     | High               | No study protocol or risk of bias assessment, and these weaknesses were not taken into account in interpretation of findings. | Yes                                                                    | Yes                                                                                            |
| Birch 2010(46)    | Shown to improve respiratory health through the first 3 years of life when infants were fed through 12 months | Yes                                                   | Yes                                                                                                                                                                                                                                                                                                                                                                                                                                                                                             | High               | No study protocol or risk of bias assessment, purposive sampling.                                                             | Yes                                                                    | Yes                                                                                            |
| Birch 2010 (46)   | DHA is: Clinically proven† to support mental, visual and immune system development                            | Partially                                             | Unclear. Authors assessed Blinded study nurses reviewed medical charts for upper respiratory infection (URI), wheezing, asthma, bronchiolitis, bronchitis, allergic rhinitis, allergic conjunctivitis, otitis media, sinusitis., atopic dermatitis (AD), and urticaria. Whether this can be considered an "immune system development" is unclear. However, the original study used on sweep visual evoked potential acuity, an objective measure of visual cortex maturity as primary outcomes. | High               | No study protocol or risk of bias assessment, purposive sampling.                                                             | Yes                                                                    | Yes                                                                                            |
| Drover 2009 (47)  | Omega-3 DHA like that found in Enfamil has been                                                               | Yes                                                   | Yes. Children who have previously received supplemented infant formula had more intentional solutions                                                                                                                                                                                                                                                                                                                                                                                           | High               | No predefined study protocol for pooled analysis                                                                              | No (but donated IF)                                                    | No                                                                                             |

|                            |                                                                                                                                                             |                                                                                                                                                                                                           |                                                                                                                                                                                                                      |              |                                                                                                |                                                  |     |  |
|----------------------------|-------------------------------------------------------------------------------------------------------------------------------------------------------------|-----------------------------------------------------------------------------------------------------------------------------------------------------------------------------------------------------------|----------------------------------------------------------------------------------------------------------------------------------------------------------------------------------------------------------------------|--------------|------------------------------------------------------------------------------------------------|--------------------------------------------------|-----|--|
|                            | clinically shown to: 9-12 months improve attention span, problem solving, and visual development                                                            |                                                                                                                                                                                                           | (successful task completions) and higher intention scores (goal-directed behaviors) than controls.                                                                                                                   |              |                                                                                                | and risk of bias assessment, purposive sampling. |     |  |
| Alexander et al. 2016 (48) | Specially designed to help support appropriate growth / A lower protein content formula has been shown to provide growth rates more like a breastfed baby.  | Partially. SMA Advanced is partially hydrolysed, which appears to be outside the scope of the reference                                                                                                   | Yes. Evaluates whether whey-predominant infant formula with the stated protein content supports growth according to WHO growth standards.                                                                            | High         | No study protocol or risk of bias assessment.                                                  | Yes                                              | Yes |  |
| Alexander 2010 (49)        | Reduces risk for atopic eczema by 55 %                                                                                                                      | Yes                                                                                                                                                                                                       | Yes. Evaluates effect of partially hydrolysed whey protein on the development of atopic dermatitis.                                                                                                                  | High         | No pre-specified protocol or risk of bias assessment. Search strategy likely to be inadequate. | Yes                                              | Yes |  |
| Czerkies 2018 (50)         | Easy-to-digest                                                                                                                                              | Yes                                                                                                                                                                                                       | Not clear. Reports a pooled analysis suggesting that PHF-W feeding may lead to softer stools compared with CMF. This is not necessarily indicative of being 'easy to digest'.                                        | High         | No study protocol, search strategy or risk of bias assessment.                                 | Yes                                              | Yes |  |
| Morale 2005 (51)           | Contains 0.3% DHA of total fatty acids, the level approved by the EFSA for normal visual development until 12 months (with an intake of 100 mg DHA per day) | Partially. Ingredient is relevant, but trial products were standard formula, and claim is made for amino acid formula.                                                                                    | Yes. Data pooled from four trials evaluating LCPUFA and visual acuity.                                                                                                                                               | High         | No study protocol, search strategy or risk of bias assessment.                                 | No (but donated IF in trials)                    | Yes |  |
| Brenna 2007 (52)           | DHA is an ingredient that supports brain development                                                                                                        | No. Systematic review assesses breastmilk fatty acid concentrations; product is an infant formula with added fatty acids; there is no direct link between the claim and the referenced systematic review. | No. This descriptive meta-analysis evaluates DHA and AA in breast-milk world-wide. Thus, it is not an appropriate reference to substantiate the claim that an IF would help development of brain/eye/nervous system. | Not relevant |                                                                                                |                                                  |     |  |



## References

1. World Health Organisation. Marketing of breast milk substitutes: national implementation of the international code, status report 2020. 2020.
2. United Nations Children's Fund (UNICEF). A Mother's Gift for Every Child BREASTFEEDING.
3. Baumann F. The Next Frontier—Human Development and the Anthropocene: UNDP Human Development Report 2020. *Environment: Science and Policy for Sustainable Development*. 2021 May 4;63(3):34–40.
4. Berry NJ, Gribble KD. Health and nutrition content claims on websites advertising infant formula available in Australia: A content analysis. *Matern Child Nutr*. 2017 Oct 14;13(4).
5. Sprenger N, Odenwald H, Kukkonen AK, Kuitunen M, Savilahti E, Kunz C. FUT2-dependent breast milk oligosaccharides and allergy at 2 and 5 years of age in infants with high hereditary allergy risk. *Eur J Nutr*. 2017 Apr;56(3):1293–301.
6. Kirchberg FF, Harder U, Weber M, Grote V, Demmelmair H, Peissner W, et al. Dietary protein intake affects amino acid and acylcarnitine metabolism in infants aged 6 months. *J Clin Endocrinol Metab*. 2015 Jan;100(1):149–58.
7. Nermes M, Kantele JM, Atosuo TJ, Salminen S, Isolauri E. Interaction of orally administered *Lactobacillus rhamnosus* GG with skin and gut microbiota and humoral immunity in infants with atopic dermatitis. *Clin Exp Allergy*. 2011 Mar;41(3):370–7.
8. Abrahamsson TR, Jakobsson HE, Andersson AF, Björkstén B, Engstrand L, Jenmalm MC. Low diversity of the gut microbiota in infants with atopic eczema. *J Allergy Clin Immunol*. 2012 Feb;129(2):434–40, 440.e1-2.
9. Scalabrin DM, Johnston WH, Hoffman DR, P'Pool VL, Harris CL, Mitmesser SH. Growth and tolerance of healthy term infants receiving hydrolyzed infant formulas supplemented with *Lactobacillus rhamnosus* GG: randomized, double-blind, controlled trial. *Clin Pediatr (Phila)*. 2009 Sep;48(7):734–44.
10. Berni Canani R, Nocerino R, Terrin G, Frediani T, Lucarelli S, Cosenza L, et al. Formula Selection for Management of Children with Cow's Milk Allergy Influences the Rate of Acquisition of Tolerance: A Prospective Multicenter Study. *J Pediatr*. 2013 Sep;163(3):771-777.e1.
11. Goehring KC, Marriage BJ, Oliver JS, Wilder JA, Barrett EG, Buck RH. Similar to Those Who Are Breastfed, Infants Fed a Formula Containing 2'-Fucosyllactose Have Lower Inflammatory Cytokines in a Randomized Controlled Trial. *J Nutr*. 2016 Dec;146(12):2559–66.
12. Ashley C, Johnston WH, Harris CL, Stolz SI, Wampler JL, Berseth CL. Growth and tolerance of infants fed formula supplemented with polydextrose (PDX) and/or galactooligosaccharides (GOS): double-blind, randomized, controlled trial. *Nutr J*. 2012 Jun 7;11:38.
13. Souza CO de, Leite MEQ, Lasekan J, Baggs G, Pinho LS, Druzian JI, et al. Milk protein-based formulas containing different oils affect fatty acids balance in term infants: A randomized blinded crossover clinical trial. *Lipids Health Dis*. 2017 Apr 14;16(1):78.

14. Leite ME de Q, Lasekan J, Baggs G, Ribeiro T, Menezes-Filho J, Pontes M, et al. Calcium and fat metabolic balance, and gastrointestinal tolerance in term infants fed milk-based formulas with and without palm olein and palm kernel oils: a randomized blinded crossover study. *BMC Pediatr*. 2013 Dec 24;13(1):215.
15. Papagaroufalis K, Fotiou A, Egli D, Tran LA, Steenhout P. A Randomized Double Blind Controlled Safety Trial Evaluating D-Lactic Acid Production in Healthy Infants Fed a *Lactobacillus reuteri* -containing Formula. *Nutr Metab Insights*. 2014 Jan 22;7:NMI.S14113.
16. Garcia Rodenas CL, Lepage M, Ngom-Bru C, Fotiou A, Papagaroufalis K, Berger B. Effect of Formula Containing *Lactobacillus reuteri* DSM 17938 on Fecal Microbiota of Infants Born by Cesarean-Section. *J Pediatr Gastroenterol Nutr*. 2016 Dec;63(6):681–7.
17. Savino F, Cordisco L, Tarasco V, Palumeri E, Calabrese R, Oggero R, et al. *Lactobacillus reuteri* DSM 17938 in infantile colic: a randomized, double-blind, placebo-controlled trial. *Pediatrics*. 2010 Sep;126(3):e526-33.
18. Lasekan JB, Baggs GE. Efficacy of Soy-Based Formulas in Alleviating Gastrointestinal Symptoms in Infants With Milk-Based Formula Intolerance: A Randomized Clinical Trial. *Clin Pediatr (Phila)*. 2021 Mar 20;60(3):184–92.
19. Scalabrin DMF, Mitmesser SH, Welling GW, Harris CL, Marunycz JD, Walker DC, et al. New prebiotic blend of polydextrose and galacto-oligosaccharides has a bifidogenic effect in young infants. *J Pediatr Gastroenterol Nutr*. 2012 Mar;54(3):343–52.
20. Salminen S, Endo A, Isolauri E, Scalabrin D. Early Gut Colonization With *Lactobacilli* and *Staphylococcus* in Infants: The Hygiene Hypothesis Extended. *J Pediatr Gastroenterol Nutr*. 2016 Jan;62(1):80–6.
21. Béghin L, Tims S, Roelofs M, Rougé C, Oozeer R, Rakza T, et al. Fermented infant formula (with *Bifidobacterium breve* C50 and *Streptococcus thermophilus* O65) with prebiotic oligosaccharides is safe and modulates the gut microbiota towards a microbiota closer to that of breastfed infants. *Clin Nutr*. 2021 Mar;40(3):778–87.
22. Chua MC, Ben-Amor K, Lay C, Neo AGE, Chiang WC, Rao R, et al. Effect of Synbiotic on the Gut Microbiota of Cesarean Delivered Infants: A Randomized, Double-blind, Multicenter Study. *J Pediatr Gastroenterol Nutr*. 2017 Jul;65(1):102–6.
23. Tannock GW, Lawley B, Munro K, Gowri Pathmanathan S, Zhou SJ, Makrides M, et al. Comparison of the Compositions of the Stool Microbiotas of Infants Fed Goat Milk Formula, Cow Milk-Based Formula, or Breast Milk. *Appl Environ Microbiol*. 2013 May;79(9):3040–8.
24. Berni Canani R, di Costanzo M, Bedogni G, Amoroso A, Cosenza L, di Scala C, et al. Extensively hydrolyzed casein formula containing *Lactobacillus rhamnosus* GG reduces the occurrence of other allergic manifestations in children with cow's milk allergy: 3-year randomized controlled trial. *Journal of Allergy and Clinical Immunology*. 2017 Jun;139(6):1906-1913.e4.
25. Berni Canani R, Nocerino R, Terrin G, Coruzzo A, Cosenza L, Leone L, et al. Effect of *Lactobacillus* GG on tolerance acquisition in infants with cow's milk allergy: a randomized trial. *J Allergy Clin Immunol*. 2012 Feb;129(2):580–2, 582.e1-5.

26. Koletzko B, von Kries R, Closa R, Escribano J, Scaglioni S, Giovannini M, et al. Lower protein in infant formula is associated with lower weight up to age 2 y: a randomized clinical trial. *Am J Clin Nutr.* 2009 Jun 1;89(6):1836–45.
27. Weber M, Grote V, Closa-Monasterolo R, Escribano J, Langhendries JP, Dain E, et al. Lower protein content in infant formula reduces BMI and obesity risk at school age: follow-up of a randomized trial. *Am J Clin Nutr.* 2014 May 1;99(5):1041–51.
28. Timby N, Domellöf E, Hernell O, Lönnerdal B, Domellöf M. Neurodevelopment, nutrition, and growth until 12 mo of age in infants fed a low-energy, low-protein formula supplemented with bovine milk fat globule membranes: a randomized controlled trial. *Am J Clin Nutr.* 2014 Apr 1;99(4):860–8.
29. Timby N, Hernell O, Vaarala O, Melin M, Lönnerdal B, Domellöf M. Infections in infants fed formula supplemented with bovine milk fat globule membranes. *J Pediatr Gastroenterol Nutr.* 2015 Mar;60(3):384–9.
30. Burks AW, Harthoorn LF, van Ampting MTJ, Oude Nijhuis MM, Langford JE, Wopereis H, et al. Synbiotics-supplemented amino acid-based formula supports adequate growth in cow's milk allergic infants. *Pediatr Allergy Immunol.* 2015 Jun;26(4):316–22.
31. Ziegler EE, Fields DA, Chernausek SD, Steenhout P, Grathwohl D, Jeter JM, et al. Adequacy of Infant Formula With Protein Content of 1.6 g/100 kcal for Infants Between 3 and 12 Months. *J Pediatr Gastroenterol Nutr.* 2015 Nov;61(5):596–603.
32. Birch EE, Carlson SE, Hoffman DR, Fitzgerald-Gustafson KM, Fu VLN, Drover JR, et al. The DIAMOND (DHA Intake And Measurement Of Neural Development) Study: a double-masked, randomized controlled clinical trial of the maturation of infant visual acuity as a function of the dietary level of docosahexaenoic acid. *Am J Clin Nutr.* 2010 Apr;91(4):848–59.
33. Colombo J, Carlson SE, Cheatham CL, Shaddy DJ, Kerling EH, Thodosoff JM, et al. Long-term effects of LCPUFA supplementation on childhood cognitive outcomes. *Am J Clin Nutr.* 2013 Aug;98(2):403–12.
34. Inostroza J, Haschke F, Steenhout P, Grathwohl D, Nelson SE, Ziegler EE. Low-protein formula slows weight gain in infants of overweight mothers. *J Pediatr Gastroenterol Nutr.* 2014 Jul;59(1):70–7.
35. Maldonado J, Cañabate F, Sempere L, Vela F, Sánchez AR, Narbona E, et al. Human Milk Probiotic *Lactobacillus fermentum* CECT5716 Reduces the Incidence of Gastrointestinal and Upper Respiratory Tract Infections in Infants. *J Pediatr Gastroenterol Nutr.* 2012 Jan;54(1):55–61.
36. Gil-Campos M, López MÁ, Rodríguez-Benítez MV, Romero J, Roncero I, Linares MD, et al. *Lactobacillus fermentum* CECT 5716 is safe and well tolerated in infants of 1–6 months of age: A Randomized Controlled Trial. *Pharmacol Res.* 2012 Feb;65(2):231–8.
37. Nowak-Węgrzyn A, Czerkies LA, Collins B, Saavedra JM. Evaluation of hypoallergenicity of a new, amino acid-based formula. *Clin Pediatr (Phila).* 2015 Mar;54(3):264–72.

38. Corkins M, Czerkies LA, Storm HM, Sun S, Saavedra JM. Assessment of Growth of Infants Fed an Amino Acid-Based Formula. *Clin Med Insights Pediatr.* 2016 Jan 4;10:CMPed.S33071.
39. Puccio G, Alliet P, Cajozzo C, Janssens E, Corsello G, Sprenger N, et al. Effects of Infant Formula With Human Milk Oligosaccharides on Growth and Morbidity: A Randomized Multicenter Trial. *J Pediatr Gastroenterol Nutr.* 2017 Apr;64(4):624–31.
40. Marriage BJ, Buck RH, Goehring KC, Oliver JS, Williams JA. Infants Fed a Lower Calorie Formula With 2'FL Show Growth and 2'FL Uptake Like Breast-Fed Infants. *J Pediatr Gastroenterol Nutr.* 2015 Dec;61(6):649–58.
41. Yao M, Lien EL, Capeding MRZ, Fitzgerald M, Ramanujam K, Yuhas R, et al. Effects of term infant formulas containing high sn-2 palmitate with and without oligofructose on stool composition, stool characteristics, and bifidogenicity. *J Pediatr Gastroenterol Nutr.* 2014 Oct;59(4):440–8.
42. Huet F, Abrahamse-Berkeveld M, Tims S, Simeoni U, Beley G, Savagner C, et al. Partly Fermented Infant Formulae With Specific Oligosaccharides Support Adequate Infant Growth and Are Well-Tolerated. *J Pediatr Gastroenterol Nutr.* 2016 Oct;63(4):e43-53.
43. Candy DCA, van Ampting MTJ, Oude Nijhuis MM, Wopereis H, Butt AM, Peroni DG, et al. A synbiotic-containing amino-acid-based formula improves gut microbiota in non-IgE-mediated allergic infants. *Pediatr Res.* 2018 Mar 6;83(3):677–86.
44. Indrio F, Riezzo G, Giordano P, Ficarella M, Miolla MP, Martini S, et al. Effect of a Partially Hydrolysed Whey Infant Formula Supplemented with Starch and *Lactobacillus reuteri* DSM 17938 on Regurgitation and Gastric Motility. *Nutrients.* 2017 Oct 28;9(11).
45. Lasekan JB, Hustead DS, Masor M, Murray R. Impact of palm olein in infant formulas on stool consistency and frequency: a meta-analysis of randomized clinical trials. *Food Nutr Res.* 2017;61(1):1330104.
46. Birch EE, Khoury JC, Berseth CL, Castañeda YS, Couch JM, Bean J, et al. The impact of early nutrition on incidence of allergic manifestations and common respiratory illnesses in children. *J Pediatr.* 2010 Jun;156(6):902-906.e1.
47. Drover J, Hoffman DR, Castañeda YS, Morale SE, Birch EE. Three randomized controlled trials of early long-chain polyunsaturated Fatty Acid supplementation on means-end problem solving in 9-month-olds. *Child Dev.* 2009;80(5):1376–84.
48. Alexander DD, Yan J, Bylsma LC, Northington RS, Grathwohl D, Steenhout P, et al. Growth of infants consuming whey-predominant term infant formulas with a protein content of 1.8 g/100 kcal: a multicenter pooled analysis of individual participant data. *Am J Clin Nutr.* 2016 Oct 1;104(4):1083–92.
49. Alexander DD, Cabana MD. Partially hydrolyzed 100% whey protein infant formula and reduced risk of atopic dermatitis: a meta-analysis. *J Pediatr Gastroenterol Nutr.* 2010 Apr;50(4):422–30.
50. Czerkies LA, Kineman BD, Cohen SS, Reichert H, Carvalho RS. A Pooled Analysis of Growth and Tolerance of Infants Exclusively Fed Partially Hydrolyzed Whey or Intact Protein-Based Infant Formulas. *Int J Pediatr.* 2018;2018:4969576.



51. Morale SE, Hoffman DR, Castañeda YS, Wheaton DH, Burns RA, Birch EE. Duration of long-chain polyunsaturated fatty acids availability in the diet and visual acuity. *Early Hum Dev.* 2005 Feb;81(2):197–203.
52. Brenna JT, Varamini B, Jensen RG, Diersen-Schade DA, Boettcher JA, Arterburn LM. Docosahexaenoic and arachidonic acid concentrations in human breast milk worldwide. *Am J Clin Nutr.* 2007 Jun;85(6):1457–64.
